1  
2  
3  
4  
5  
6  
7  
8  
9  
10  
11  
12  
13  
14  
15  
16  
17  
18  
19  
20  
21  
22  
23  
24  
25  
26  
27  
28  
29  
30  
31  
32  
33  
34

# **Transient developmental increase of prefrontal activity alters network maturation and causes cognitive dysfunction in adult mice**

Sebastian H. Bitzenhofer<sup>1,#,\*;§</sup>, Jastyn A. Pöpplau<sup>1,#</sup>, Mattia Chini<sup>1</sup>, Annette Marquardt<sup>1</sup> & Ileana L. Hanganu-Opatz<sup>1,\*</sup>

<sup>1</sup> Developmental Neurophysiology, Center for Molecular Neurobiology, University Medical Center Hamburg-Eppendorf, Hamburg, Germany

# Co- first authors

§Current address: Center for Neural Circuits and Behavior, Department of Neurosciences, University of California, San Diego, La Jolla, CA, USA.

\* Corresponding authors: Ileana L. Hanganu-Opatz  
hangop@zmnh.uni-hamburg.de  
Falkenried 94, 20251 Hamburg, Germany

Sebastian Bitzenhofer  
sbitzenhofer@ucsd.edu  
9500 Gilman Dr., La Jolla, CA 92093, USA

8 Figures  
9 Extended Data Figures  
2 Extended Data Table  
150 words abstract  
3810 words main text

## **Running title**

Early activity is critical for prefrontal development

35 **Abstract**

36 Disturbed neuronal activity in neuropsychiatric pathologies emerges during development  
37 and might cause multifold neuronal dysfunction by interfering with apoptosis, dendritic  
38 growth and synapse formation. However, how altered electrical activity early in life  
39 impacts neuronal function and behavior of adults is unknown. Here, we address this  
40 question by transiently increasing the coordinated activity of layer 2/3 pyramidal neurons  
41 in the medial prefrontal cortex of neonatal mice and monitoring long-term functional and  
42 behavioral consequences. We show that increased activity during early development  
43 causes premature maturation of pyramidal neurons and alters interneuron density.  
44 Consequently, reduced inhibitory feedback by fast-spiking interneurons and  
45 excitation/inhibition imbalance in prefrontal circuits of young adults result in weaker  
46 evoked synchronization in gamma frequency. These structural and functional changes  
47 ultimately lead to poorer mnemonic and social abilities. Thus, prefrontal activity during  
48 early development actively controls the cognitive performance of adults and might be  
49 critical for cognitive symptoms of neuropsychiatric diseases.

50

51 **Main**

52 The prefrontal cortex acts as a hub of cognitive processing indispensable for the daily  
53 life<sup>1,2</sup>. Disruption of prefrontal-dependent short-term memory and executive performance  
54 is the major burden of neuropsychiatric diseases, such as schizophrenia and autism  
55 spectrum disorders<sup>3-5</sup>. These diseases have been associated with a large variety of  
56 genes and environmental risk factors that increase susceptibility<sup>6,7</sup>. The absence of a  
57 clear understanding of their pathophysiology has resulted in primarily symptom-based  
58 treatments with low response rates<sup>8</sup>. Many of the genes and risk factors associated with  
59 neuropsychiatric diseases regulate brain development, leading to the hypothesis that  
60 abnormal maturation causes impaired network function and ultimately poor cognitive  
61 abilities later in life<sup>8-11</sup>. Indeed, rhythmic network activity of cortical, and particularly  
62 prefrontal circuits is already compromised in prodromal patients<sup>12,13</sup> and during early  
63 postnatal development in mouse models of schizophrenia and autism<sup>14-17</sup>.

64 Neuronal activity regulates the development of cortical networks in many ways,  
65 from controlling neuronal differentiation, migration and apoptosis up to shaping the  
66 establishment of sensory maps, local and large-scale networks<sup>18-21</sup>. Early in life, activity  
67 in the prefrontal cortex is coordinated in oscillatory patterns, yet, in line with the delayed  
68 structural maturation and emergence of cognitive abilities, they appear later than in other  
69 cortical areas<sup>22</sup>. Inputs from cortical and subcortical areas boost the activation of local  
70 prefrontal circuits<sup>22-25</sup>. Moreover, intracortical interactions lead to the emergence of  
71 oscillatory activity at fast frequencies<sup>26,27</sup>. However, whether early activity is necessary  
72 for the maturation of prefrontal function and cognitive abilities is still unknown.  
73 Conversely, to which extent altered activity during development actively contributes to  
74 adult miswiring relevant for disease conditions, instead of simply reflecting pathological  
75 maturation, remains to be elucidated.

76 To address these questions, we manipulated cortical activity during early  
77 development and monitored the long-term consequences for network activity and  
78 behavioral abilities. The manipulation was achieved by transient light stimulation of a  
79 subset of pyramidal neurons (PYRs) in layer (L) 2/3 of the mouse medial prefrontal cortex  
80 (mPFC) from postnatal day (P) 7 to 11, the developmental time window corresponding to  
81 the second/third trimester of gestation in humans<sup>28</sup>. This light stimulation induces rhythmic

82 activity in beta/low gamma frequency in the developing prefrontal cortex<sup>26</sup>. At the age of  
83 stimulation, the migration of cortical neurons has finished and the activity-dependent  
84 formation of synaptic connections is in full progress<sup>18,29,30</sup>. We focused on this critical  
85 developmental period for cortical network formation at which mouse models of psychiatric  
86 diseases start to show altered prefrontal activity caused by L2/3 PYRs dysfunction<sup>14</sup>. We  
87 demonstrate that the transient increase of prefrontal activity during early development is  
88 sufficient to disrupt prefrontal function and cognitive performance at young adult age.

89

## 90 **Results**

### 91 **Stimulation of L2/3 pyramidal neurons induces coordinated activity in the neonatal** 92 **mPFC**

93 To uncover the role of early activity for adult prefrontal function, we firstly established a  
94 protocol to optically manipulate the activity of L2/3 PYRs from P7-11, the developmental  
95 time window critical for the formation of synaptic contacts in mPFC (Fig. 1a). For this, a  
96 subset of precursor cells of L2/3 PYRs in the prelimbic subdivision of the mPFC was  
97 transfected with channelrhodopsin 2 E123T/T159C (ChR2(ET/TC)) by in utero  
98 electroporation (IUE) at embryonic day (E) 15.5. As previously reported, the IUE protocol  
99 yields unilateral expression of ChR2(ET/TC) in 20-30% of PYRs confined to L2/3 in the  
100 mPFC (Fig. 1b)<sup>31</sup>.

101 Ramp stimulations of linearly increasing light power (473 nm, 3 s) were used to  
102 activate transfected L2/3 PYRs from P7 to P11. In line with previous data<sup>26</sup>, prefrontal  
103 network activity tended to organize itself rhythmically at 15-20 Hz upon ramp stimulation  
104 (Fig. 1c,d). This rhythmic activity resembled the discontinuous activity spontaneously  
105 occurring in the neonatal mPFC<sup>22,32</sup>. Ramp light stimulation increased neuronal firing in a  
106 subset of neurons (20.2% of units significantly activated, 0.6% of units significantly  
107 inactivated) (Fig. 1e, f). Induced firing was not random, but peaked at 15-20 Hz for  
108 individual units, similar to induced network activity (Fig. 1g). Due to the thin skull at this  
109 age, similar activity was induced with transcranial light stimulation (Extended Data Fig.  
110 1a). Control light stimulations (594 nm, ramp, 3 s) that do not activate ChR2(ET/TC) did  
111 not change the firing and network activity in the mPFC (Extended Data Fig. 1b-f).

Early activity is critical for prefrontal development

Bitzenhofer, Pöplau, et al.

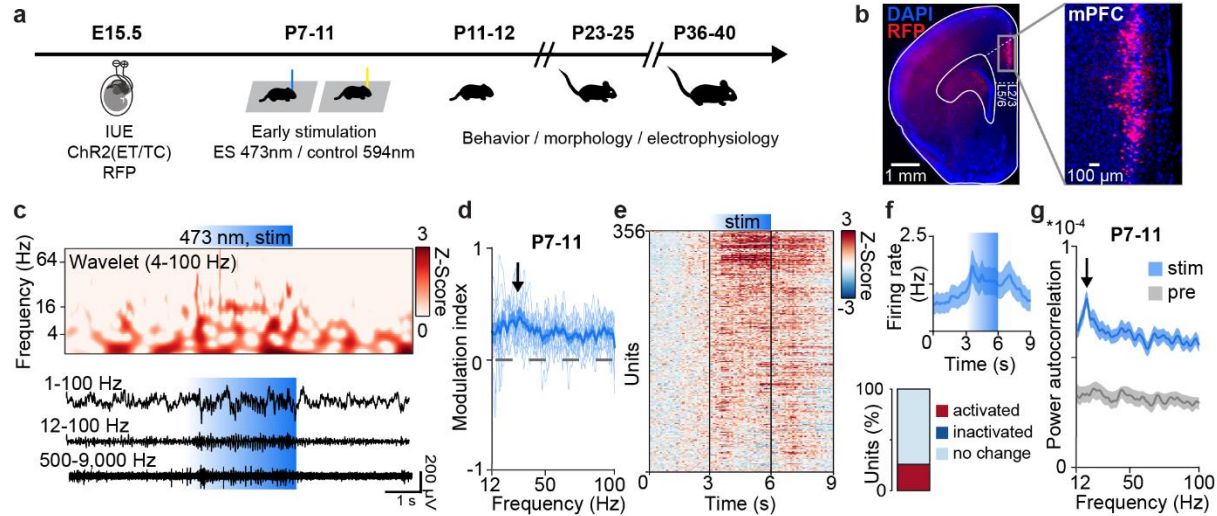

112

113 **Fig. 1. Light stimulation of L2/3 PYRs in the neonatal mPFC.** (a) Schematic of the protocol for  
 114 early light stimulation and long-lasting monitoring of structural, functional, and behavioral effects  
 115 during development. (b) Representative image showing Chr2(ET/TC)-2A-RFP-expression in  
 116 L2/3 PYRs after IUE at E15.5 in a DAPI-stained coronal slice including the mPFC from a P11  
 117 mouse. (c) Representative extracellular recording displayed together with corresponding wavelet  
 118 spectrum at identical time scale during ramp light stimulation (473 nm, 3 s) of L2/3 PYRs in the  
 119 mPFC of a P11 mouse. (d) Modulation index of local field potential (LFP) power in response to  
 120 ramp light stimulation averaged for P7-11 mice (n=13). (e) Firing rates of single units (n=356 units  
 121 from 13 mice) in response to ramp light stimulation z-scored to pre-stimulation period. (f) Single  
 122 unit firing rate during ramp light stimulation averaged for P7-11 mice (top, n=356 units from 13  
 123 mice) and percent of significantly modulated units (bottom). (g) Power of single unit  
 124 autocorrelations before (pre) and during (stim) ramp light stimulation averaged for P7-11 mice  
 125 (n=356 units from 13 mice).

126

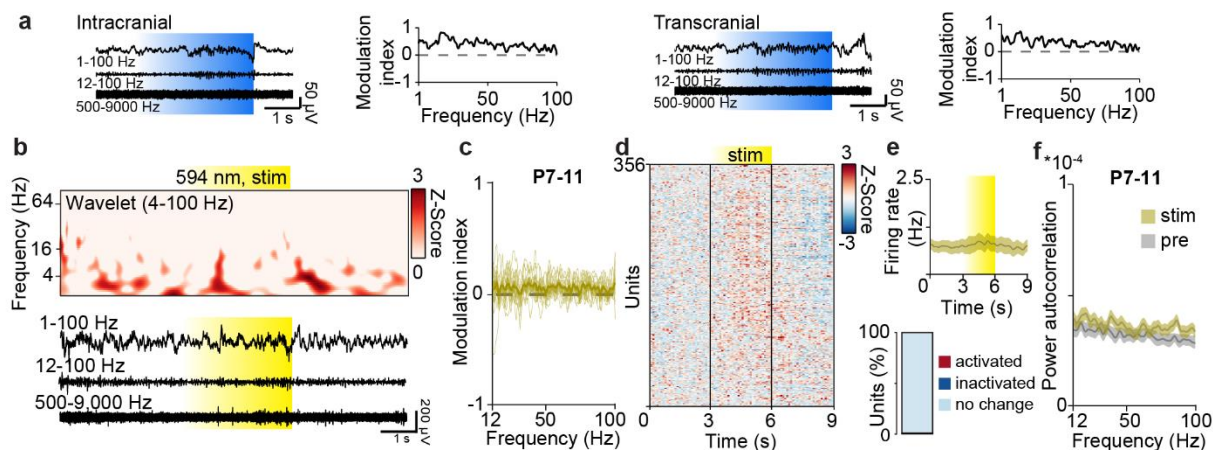

127

128 **Extended Data Fig. 1. Control light stimulation of L2/3 PYRs in the neonatal mPFC.** (a)  
 129 Representative extracellular recordings during intracranial (left) and transcranial (right) ramp light  
 130 stimulations (473 nm, 3 s) of L2/3 PYRs, as well as corresponding MI of power spectra for a P11  
 131 mouse. (b) Representative extracellular recording displayed together with corresponding wavelet

132 spectrum at identical time scale during control ramp light stimulation (594 nm, 3 s) of L2/3 PYRs  
133 in the mPFC of a P11 mouse. (c) Modulation index of LFP power in response to control ramp light  
134 stimulation averaged for P7-11 mice (n=13). (d) Firing rates of single units (n=356 units from 13  
135 mice) in response to control ramp light stimulation z-scored to pre-stimulation period. (e) Single  
136 unit firing rate during control ramp light stimulation averaged for P7-11 mice (top, n=356 units  
137 from 13 mice) and percent of significantly modulated units (bottom). (f) Power of single unit  
138 autocorrelations before (pre) and during (stim) control ramp light stimulation averaged for P7-11  
139 mice (n=356 units from 13 mice).

140

## 141 **Transient increase of prefrontal activity during neonatal development disrupts** 142 **cognitive performance of young adults**

143 To transiently increase neuronal firing and network activation in the developing mPFC,  
144 we performed the transcranial stimulation that induced fast oscillatory discharges daily  
145 from P7 to P11. This developmental period has been identified as being critical for altered  
146 prefrontal activity in a mouse model of neuropsychiatric diseases<sup>14</sup>. On each of the five  
147 days of manipulation, mice received 30 transcranial ramp light stimulations (3 s long) at  
148 either 594 nm (control) or 473 nm (early stimulation, ES) to activate the ChR2(ET/TC)-  
149 transfected L2/3 PYRs in the mPFC.

150 Subsequently, we tested the behavioral abilities of control and ES mice, focusing  
151 on tasks that require prefrontal function. Data from mice of both sexes were pooled, since  
152 their performance was comparable in all tasks (Extended Data Tab. 2). Transient early  
153 stimulation did not affect the overall somatic and reflex development (Extended Data Fig.  
154 2). First, we monitored recognition memory as a form of short-term memory that emerges  
155 at pre-juvenile age (P16-22), as soon as sensory and motor abilities are fully mature<sup>33</sup>. In  
156 contrast to control mice, ES mice were not able to distinguish a novel from a familiar  
157 object (novel object recognition, NOR) as well as an object they more recently interacted  
158 with (recency recognition, RR) (Fig. 2a,b). However, group differences were not  
159 significant for NOR and RR. The novel position of an object (object location recognition,  
160 OLR) was distinguished by both control and ES mice (Extended Data Fig. 3b). In contrast  
161 to NOR and RR, OLR depends more on hippocampus than mPFC<sup>34</sup>. Social interactions  
162 were significantly impaired in pre-juvenile ES mice. Their preference for interaction with  
163 the dam-containing container over an empty container was significantly reduced  
164 compared to control mice (Fig. 2c).



165 Second, we tested mPFC-dependent working memory of young adult (P36-40)  
 166 control and ES mice. To this end, we used an 8-arm radial maze test with 4 baited arms,  
 167 a Y-maze test for spontaneous alternations and a delayed non-match-to-sample task. ES  
 168 mice showed working memory and reference memory deficits in the 8-arm radial maze  
 169 test (Fig. 2d,e, Extended Data Fig.3d). Moreover, when compared to controls, ES mice  
 170 showed poorer performance during spontaneous alternation (Fig. 2f, Extended Data  
 171 Fig.3c). and in the delayed non-match-to-sample task (Fig. 2g). The deficits identified in  
 172 ES mice are not due to impaired motor abilities or enhanced anxiety, since neither the  
 173 behavior in an open field nor the interaction with objects and mazes was different between  
 174 groups (Extended Data Fig. 3a,c,d). Thus, transient elevation of prefrontal activity at  
 175 neonatal age caused long-lasting impairment of mPFC-dependent short-term and  
 176 working memory as well as social behavior.  
 177

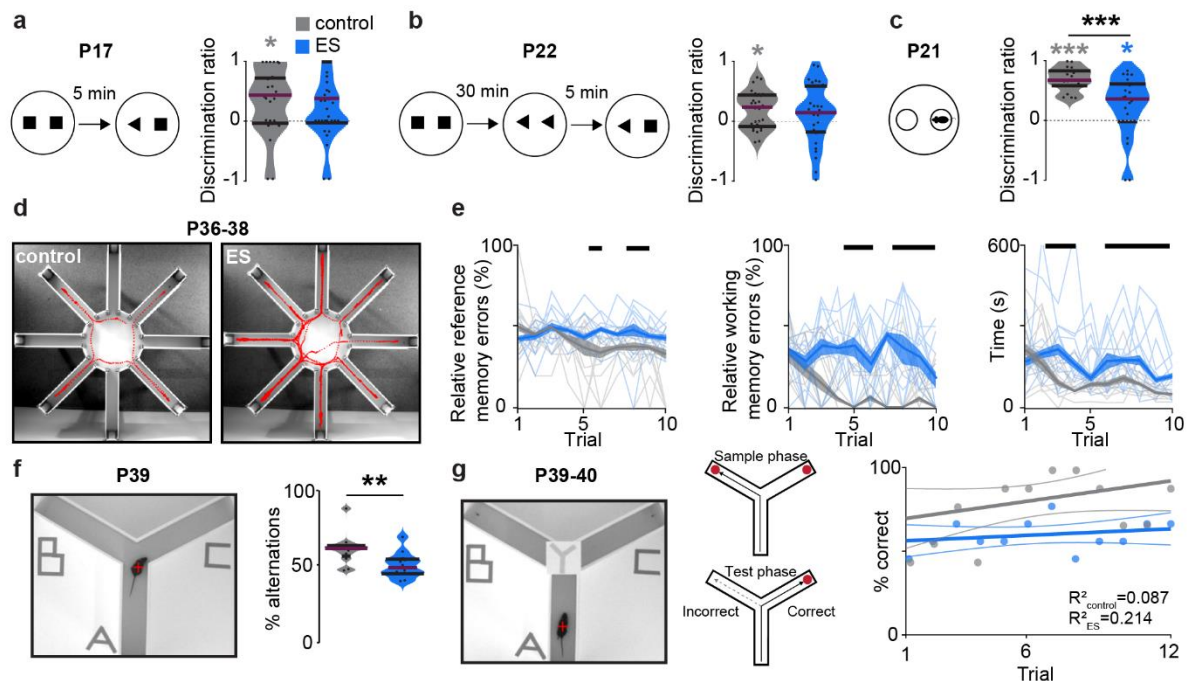

178  
 179 **Fig. 2. Transient early stimulation impairs cognitive abilities of juvenile and young adult**  
 180 **mice.** (a) Schematic of NOR task and violin plot displaying the discrimination ratio of interaction  
 181 time with a novel vs. familiar object for control (n=28) and ES (n=30) mice at P17. (Wilcoxon rank,  
 182 control p=0.018, ES p=0.157, control-ES p=0.177). (b) Schematic of RR task and violin plot  
 183 displaying the discrimination ratio of interaction time with a less vs. more recent object for control  
 184 (n=28) and ES (n=30) mice at P22. (Wilcoxon rank, control p=0.010, ES p=0.171, control-ES  
 185 p=0.498). (c) Schematic of maternal interaction task and violin plot displaying the discrimination  
 186 ratio of interaction time with mother vs. empty bin for control (n=19) and ES (n=21) mice at P21.

187 (Wilcoxon rank, control  $p < 0.001$ , ES  $p = 0.045$ , control-ES  $p < 0.001$ ). (d) Representative tracking  
188 of a control (left) and ES mouse (right) in an 8-arm radial maze memory task with 4 baited arms  
189 at P36-38. (e) Plots displaying the relative reference (left) and working-memory errors (middle),  
190 as well as the time to complete the task (right) in 8-arm radial maze memory task over 10 trials  
191 on 3 consecutive days for control ( $n = 12$ ) and ES ( $n = 12$ ) mice. (Kruskall-Wallis, relative reference  
192 memory errors  $p < 0.001$ , relative working memory errors  $p < 0.001$ , time  $p < 0.001$ ). (f) Photograph  
193 illustrating a spontaneous alternation task in a Y-maze (left) and violin plot displaying the percent  
194 of spontaneous alternations (right) for control ( $n = 12$ ) and ES ( $n = 12$ ) mice at P39. (Wilcoxon rank,  
195  $p = 0.006$ ). (g) Photograph illustrating a delayed non-match-to-sample task in a Y-maze (left) and  
196 dot plot displaying the percent of correct choices over 12 consecutive trials (6 trials/day) (right)  
197 for control ( $n = 12$ ) and ES ( $n = 12$ ) mice at P39-40. Black lines and asterisks (\*  $p < 0.05$ , \*\*  $p < 0.01$ ,  
198 \*\*\*  $p < 0.001$ ) indicate significant differences (see Extended Data Tab. 1 for detailed statistics).

199

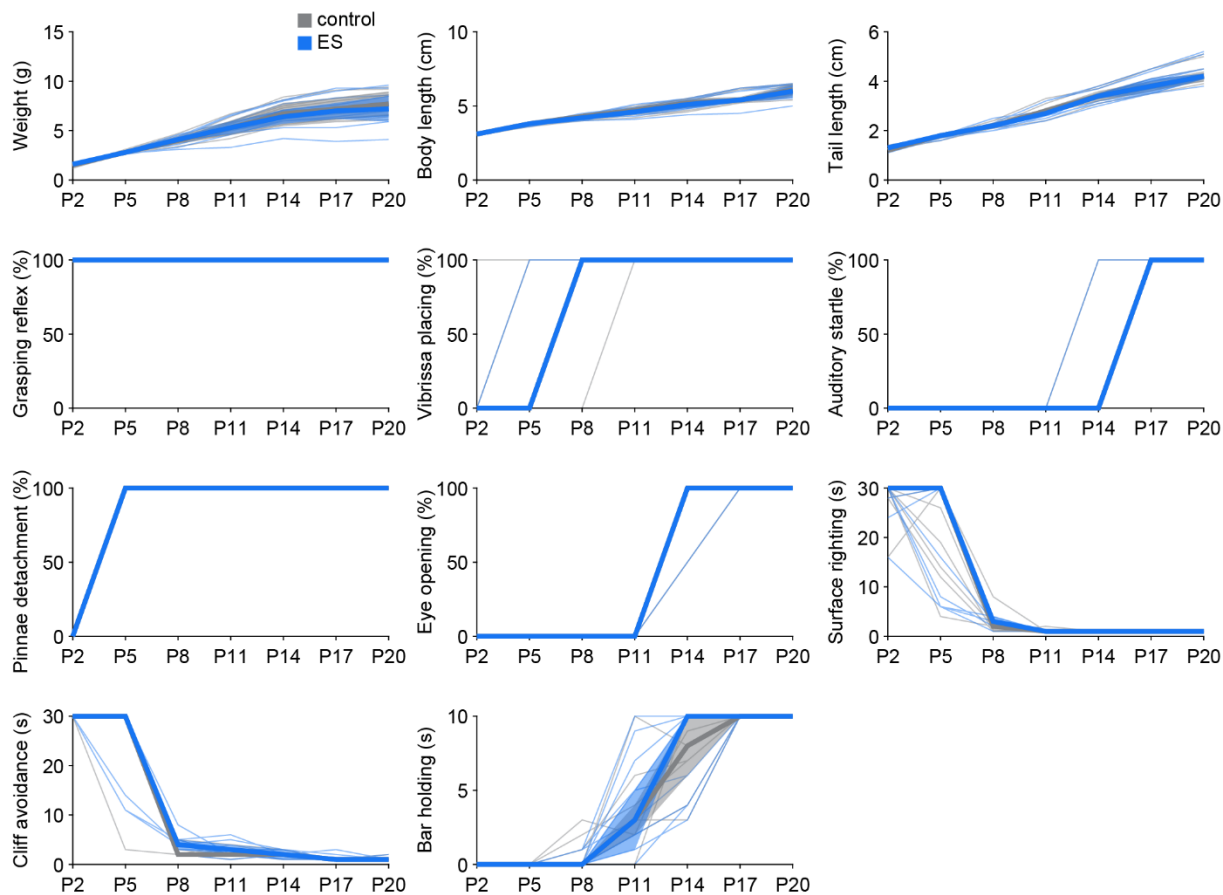

200

201 **Extended Data Fig. 2. ES and control mice have similar somatic and reflex development.**

202 Line plots displaying the age-dependence of developmental milestones for control ( $n = 11$ ) and ES  
203 ( $n = 11$ ) mice. (See Extended Data Tab. 1 for detailed statistics).

204



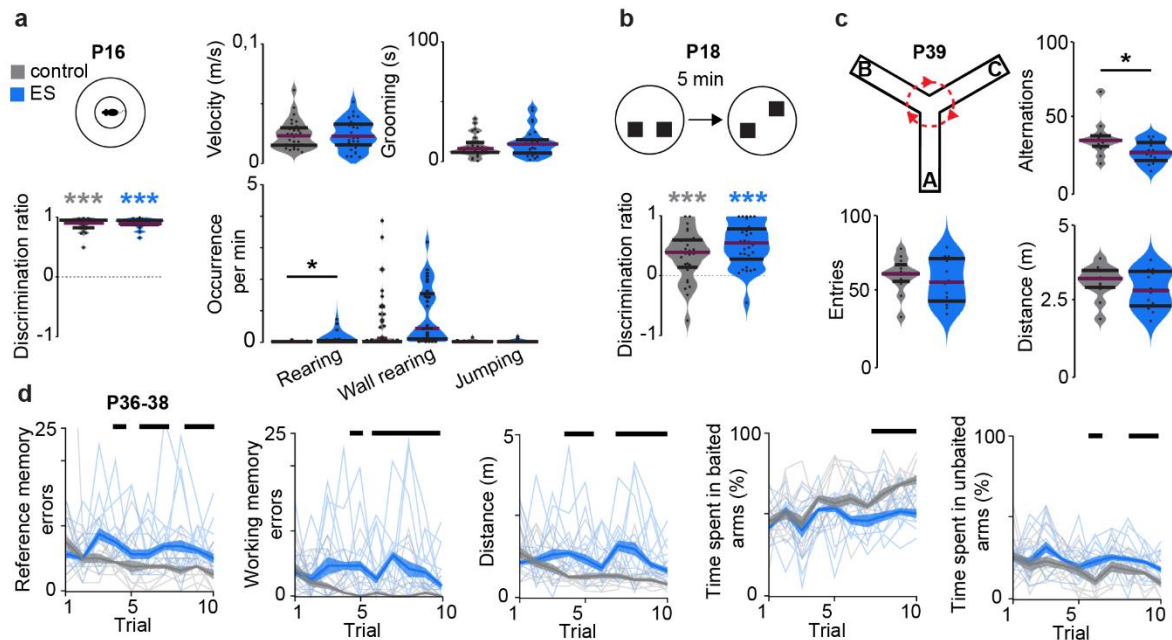

205  
 206 **Extended Data Fig. 3. Transient early stimulation impairs mPFC-dependent cognitive**  
 207 **abilities but not motor and anxiety behavior of juvenile and young adult mice.** (a) Schematic  
 208 of an open field task (top left) and violin plots displaying the discrimination ratio of time spend in  
 209 border area vs. center area (bottom left), as well as the basic behavior (velocity, grooming,  
 210 rearing, wall rearing, jumping) (right) for control (n=28) and ES (n=30) mice at P16. (Wilcoxon  
 211 rank, discrimination ratio, control p<0.001, ES p<0.001, control-ES p=0.809). (b) Schematic of  
 212 OLR task (top) and violin plot displaying the discrimination ratio of interaction time with an object  
 213 in a novel vs. familiar location (bottom) for control (n=28) and ES (n=30) mice at P18. (Wilcoxon  
 214 rank, control p<0.001, ES p<0.001, control-ES p=0.154). (c) Schematic showing spontaneous  
 215 alternation in a Y-maze as well as violin plots displaying quantified parameters (alternations,  
 216 entries, distance) for control (n=12) and ES (n=12) mice at P39. (Wilcoxon rank, alternations,  
 217 p=0.046). (d) Line plots displaying reference- and working-memory errors as well as further task-  
 218 related parameters for an 8-arm radial maze memory task over 10 trials on 3 consecutive days  
 219 for control (n=12) and ES (n=12) mice at P36-38. (Kruskal-Wallis, reference memory errors  
 220 p<0.001, working memory errors p<0.001). Black lines and asterisks (\* p<0.05, \*\* p<0.01, \*\*\*  
 221 p<0.001) indicate significant differences (see Extended Data Tab. 1 for detailed statistics).  
 222

223 **Transient increase of neonatal prefrontal activity induces premature dendritic**  
 224 **growth in L2/3 pyramidal neurons**

225 To test whether impaired cognitive abilities of juvenile and adult ES mice resulted from  
 226 permanent structural disruption of the mPFC after transient increase of neonatal activity,  
 227 we monitored the structural maturation of PYRs in control and ES mice. The density of  
 228 CaMKII-positive neurons and of Chr2(ET/TC)-transfected neurons did not differ between  
 229 control and ES mice at all investigated developmental time points (P11-12, P23-25 and  
 230 P38-40) (Extended Data Fig. 4). Investigation of the dendritic morphology of L2/3 PYRs

231 after transient stimulation at P7-11 revealed that immediately after this time window the  
 232 dendritic arborization (i.e. dendrite length, number of intersections) of these neurons was  
 233 increased in ES compared to control mice (Fig. 3). However, the exuberant arborization  
 234 was transient and from P23-25 on, the dendritic arbors of L2/3 PYRs in the mPFC of ES  
 235 mice were similar to controls. A comparison across age revealed that the dendritic length  
 236 increased with age for control (linear mixed effect models (LMEM), P11-12 to P23-25  
 237  $p=0.002^{**}$ , P11-12 to P38-40  $p=0.0002^{***}$ ), but not for ES mice (LMEM, P11-12 to P23-  
 238 25  $p=0.79$ , P11-12 to P38-40  $p=0.07$ ). Of note, dendritic length of L2/3 PYRs in ES mice  
 239 at P11-12 was comparable to control mice at P23-25 (LMEM,  $p=0.33$ ). These results  
 240 suggest that increased activity in the neonatal mPFC causes premature dendritic  
 241 maturation of L2/3 PYRs.

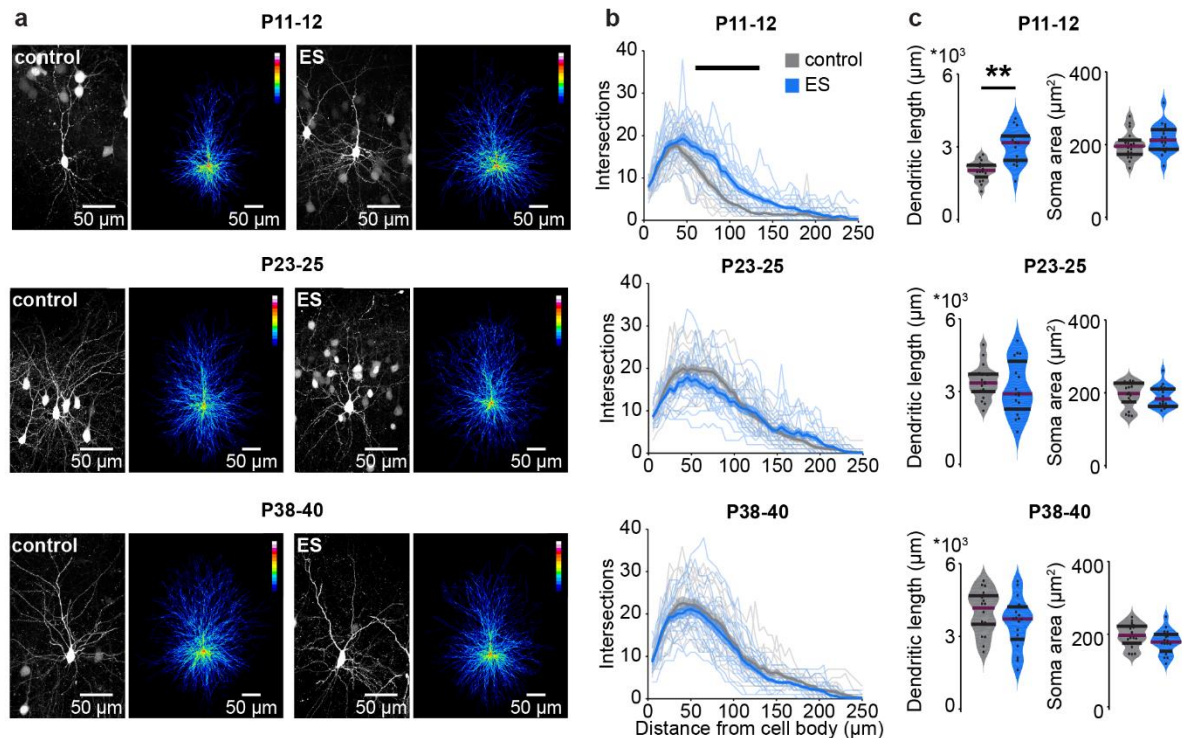

242

243 **Fig. 3. Transient early stimulation induces premature dendritic growth in prefrontal L2/3**  
 244 **PYRs. (a)** Representative photographs and corresponding average heat maps of ChR2(ET/TC)-  
 245 transfected L2/3 PYRs in the mPFC of P11-12, P23-25 and P38-40 control (left) and ES mice  
 246 (right). **(b)** Line plots of dendritic intersections of L2/3 PYRs with concentric circles (0-250 μm  
 247 radius) centered around the soma averaged for control (18 cells of 3 mice/age group) and ES  
 248 mice (18 cells of 3 mice/age group) at P11-12, P23-25 and P38-40. (LMEM, P11-12  $p<0.001$ ,  
 249 P23-25  $p<0.001$ , P38-40  $p<0.001$ ). **(c)** Violin plots displaying the dendritic length and soma area  
 250 of L2/3 PYRs for control (18 cells from 3 mice/age group) and ES (18 cells from 3 mice/age group)  
 251 mice for different age groups. (LMEM, dendritic length, P11-12  $p=0.007$ , P23-25  $p=0.631$ , P38-

252 40 p=0.161). Black lines and asterisks (\* p<0.05, \*\* p<0.01, \*\*\* p<0.001) indicate significant  
253 differences (see Extended Data Tab. 1 for detailed statistics).

254

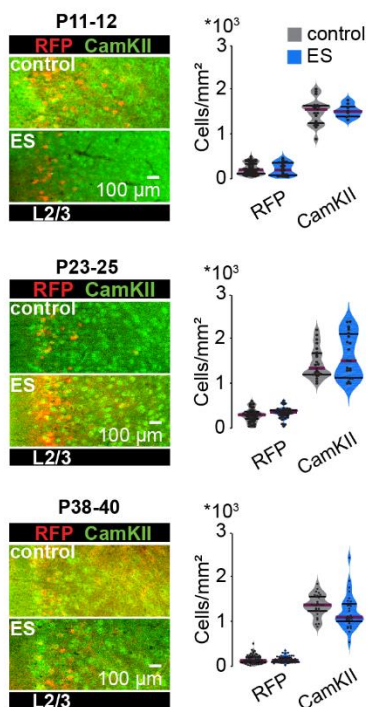

255

256 **Extended Data Fig. 4. Transient early stimulation does not alter the density of L2/3 PYRs.**  
257 Left, representative photographs displaying CaMKII immunostainings in the ChR2(ET/TC)-RFP-  
258 transfected mPFC of control and ES mice at P11-12 (control, RFP n=60 slices of 9 mice, CamKII  
259 n=19 slices of 6 mice; ES, RFP n=27 slices of 4 mice, CamKII n=9 slices of 2 mice), P23-25  
260 (control, RFP n=47 slices of 5 mice, CamKII n=23 slices of 5 mice; ES, RFP n=43 slices of 5 mice,  
261 CamKII n=23 slices of 5 mice) and P38-40 (control, RFP n=65 slices of 5 mice, CamKII n=29  
262 slices of 5 mice; ES, RFP n=62 slices of 5 mice, CamKII n=29 slices of 5 mice). Right, violin plots  
263 of RFP-expressing and CaMKII-positive neuronal density at different age groups. (LMEM, P11-  
264 12, RFP p=0.855, CamKII p=0.705, P23-25, RFP p=0.819, CamKII p=0.527, P38-40, RFP  
265 p=0.819, CamKII p=0.177). (See Extended Data Tab. 1 for detailed statistics).

266

## 267 **Transient increase of neonatal prefrontal activity reduces gamma power and** 268 **network synchrony in the adult mPFC**

269 Transient alteration of neonatal activity might perturb the function of prefrontal circuits,  
270 ultimately leading to abnormal behavior. To test this hypothesis, we monitored  
271 spontaneous neuronal and network activity of the mPFC across development. We  
272 performed extracellular recordings from head-fixed control and ES mice immediately after  
273 transient early stimulation (P11-12), at juvenile (P23-25) and young adult (P38-40) age  
274 (Fig. 4a,b). With increasing age, spontaneous oscillatory activity in the mPFC of control

275 and ES mice increased in power and fast oscillations within 12-100 Hz became more  
 276 prominent (Fig. 4c). At P11-12, the power of these fast oscillations was increased in the  
 277 mPFC of ES mice compared to control mice, in accordance with the premature growth of  
 278 L2/3 PYRs dendrites. At later stages of development, no differences were detected  
 279 between control and ES mice. In contrast, the firing rates of single units were similar in  
 280 control and ES mice during development, yet, at adulthood, ES mice showed decreased  
 281 firing in the mPFC (Fig. 4d).

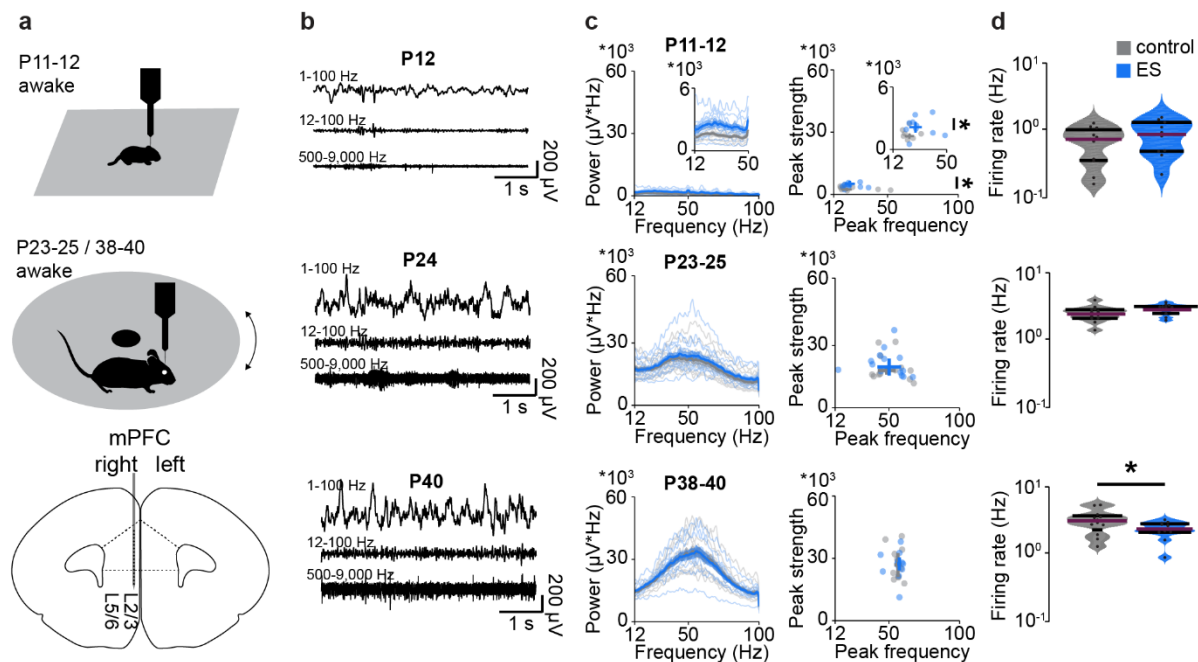

282

283 **Fig. 4. Transient early stimulation has minor effects on spontaneous network activity and**  
 284 **firing in the developing mPFC.** (a) Top, schematic illustrating the recording setups used for  
 285 young mice with limited motor abilities (head-fixed, no movement) and for juvenile and young  
 286 adult mice (head-fixed, freely moving on a spinning disk). Bottom, schematic of the recording  
 287 configuration in the developing mPFC. (b) Representative extracellular recordings in the mPFC  
 288 at P12, P24 and P40. (c) Left, average power spectra of spontaneous network activity in the  
 289 mPFC of control and ES mice at P11-12 (control n=11 recordings, 11 mice, ES n=10 recordings,  
 290 10 mice), P23-25 (control n=13 recordings, 6 mice, ES n=14 recordings, 5 mice) and P38-40  
 291 (control n=12 recordings, 5 mice, ES n=12 recordings, 5 mice). Inset, power spectra for P11-12  
 292 shown at higher magnification. Right, scatter plots displaying peak strength and peak frequency  
 293 of LFP power for control and ES mice. (Wilcoxon rank, P11-12, peak frequency p=0.245, peak  
 294 strength p=0.015, LMEM, P23-25, peak frequency p=0.643, peak strength p=0.665, P38-40, peak  
 295 frequency p=0.856, peak strength p=0.750). (d) Violin plots displaying the firing rates of single  
 296 units in the mPFC averaged for control and ES mice at P11-12, P23-25, and P38-40. (Wilcoxon  
 297 rank, P11-12 p=0.275, LMEM, P23-25 p=0.072, P38-40 p=0.041). Asterisks (\* p<0.05, \*\* p<0.01,  
 298 \*\*\* p<0.001) indicate significant differences (see Extended Data Tab. 1 for detailed statistics).

299



300 Even though spontaneous activity is largely unaffected by the transient increase  
301 of activity at neonatal age, the mPFC might abnormally respond to incoming stimuli,  
302 leading to disrupted processing and ultimately, behavior. To test this hypothesis, we used  
303 optogenetics to stimulate ChR2(ET/TC)-transfected L2/3 PYRs. Acute light stimulations  
304 (ramp, 473 nm, 3 s) triggered fast rhythmic activity with peak frequencies increasing from  
305 15-20 Hz (beta frequency range) at P11-12 to 50-60 Hz (gamma frequency range) at P23-  
306 25 and P38-40 in the mPFC of control and ES mice (Fig. 5a). These results are in line  
307 with recent data, showing an acceleration of fast frequency oscillations during prefrontal  
308 development<sup>35</sup>. However, at P38-40 the magnitude of light-induced gamma activity was  
309 significantly smaller in ES mice compared to controls. This weaker prefrontal activation in  
310 fast oscillatory rhythms upon acute stimulation for ES mice, specific for young adults, was  
311 replicated in a separate cohort of anesthetized head-fixed mice (Extended Data Fig. 5a-  
312 c). Furthermore, young adult ES mice had weaker synchrony within and between  
313 hemispheres during evoked activity. Both, the coherence between L2/3 and L5/6 of the  
314 stimulated hemisphere and the coherence between L2/3 across hemispheres was  
315 reduced in ES mice at P38-40, but was normal at younger age (Extended Data Fig. 5d,e).

316 Additionally, we analyzed single unit firing to assess the response of prefrontal  
317 neurons to acute light stimulation in control and ES mice across development. Calculation  
318 of autocorrelations for prefrontal units showed that independent of age and group,  
319 neurons fire rhythmically in response to acute light stimulation (Fig. 5b). Similar to network  
320 oscillations, the strength and frequency of the rhythmicity of neuronal firing increased with  
321 age, yet the magnitude of increase was lower for ES mice, reaching significance at P38-  
322 40. In contrast, the rhythmicity of spontaneous firing of prefrontal units was similar for  
323 control and ES mice at all age groups (Extended Data Fig. 6).

324



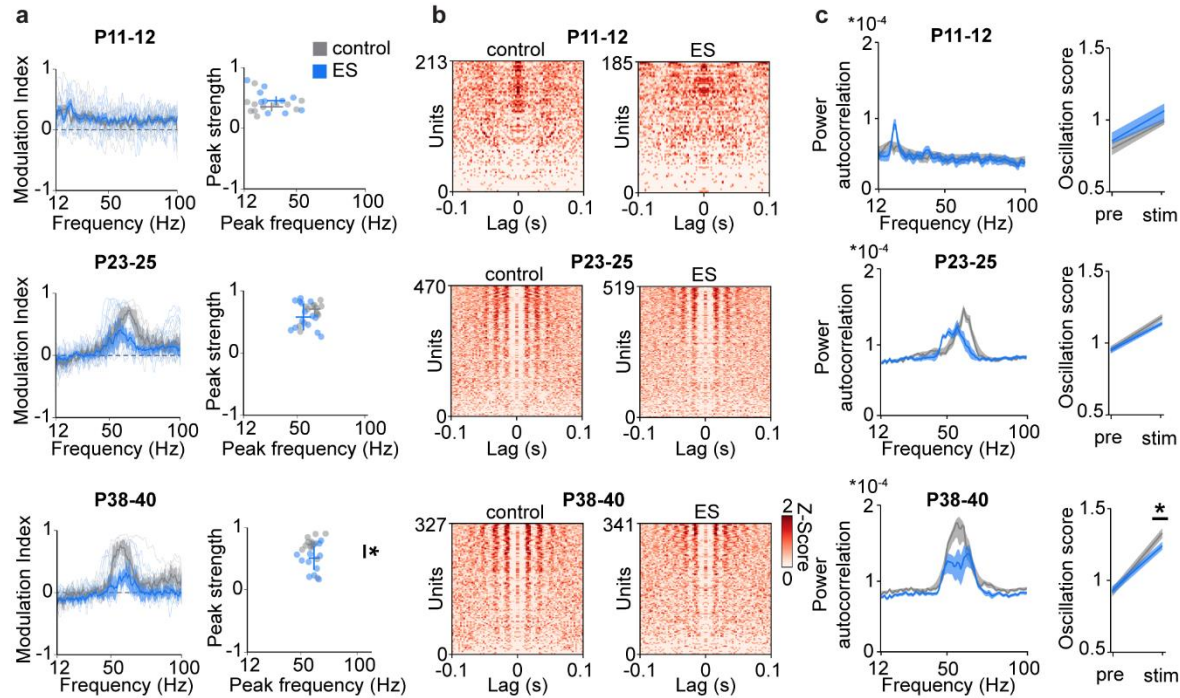

325

326 **Fig. 5. Transient early stimulation decreases evoked network and neuronal gamma**  
 327 **rhythmicity in the adult mPFC.** (a) Left, modulation index of LFP power in response to acute  
 328 ramp light stimulation (473 nm, 3 s) for control and ES mice at P11-12 (control n=11 recordings,  
 329 11 mice, ES n=10 recordings, 10 mice), P23-25 (control n=13 recordings, 6 mice, ES n=14  
 330 recordings, 15 mice) and P38-40 (control n=12 recordings, 5 mice, ES n=12 recordings, 5 mice).  
 331 Right, scatter plots displaying the peak strength and peak frequency of the power modulation  
 332 index for control and ES mice. (Wilcoxon rank, P11-12, peak frequency p=0.307, peak strength  
 333 p=0.307, LMEM, P23-25, peak frequency p=0.136, peak strength p=0.419, P38-40, peak  
 334 frequency p=0.913, peak strength p=0.043). (b) Z-scored autocorrelograms of single units during  
 335 acute ramp light stimulation arranged by magnitude for control and ES mice at P11-12 (control  
 336 n=213 units, 11 mice, ES n=185 units, 10 mice), P23-25 (control n=470 units, 6 mice, ES n=519  
 337 units, 5 mice) and P38-40 (control n=327 units, 5 mice, ES n=341 units, 5 mice). (c) Left,  
 338 average power of single unit autocorrelograms during acute ramp light stimulation for control  
 339 and ES mice at different age. Right, oscillation score of single units before (pre) and during (stim)  
 340 acute ramp light stimulation. (LMEM, oscillation score, P11-12, pre p=0.406, stim p=0.156, P23-25,  
 341 pre p=0.272, stim p=0.478, P38-40, pre p=0.428, stim p=0.030). Asterisks (\* p<0.05, \*\* p<0.01, \*\*\*  
 342 p<0.001) indicate significant differences (see Extended Data Tab. 1 for detailed statistics).

343

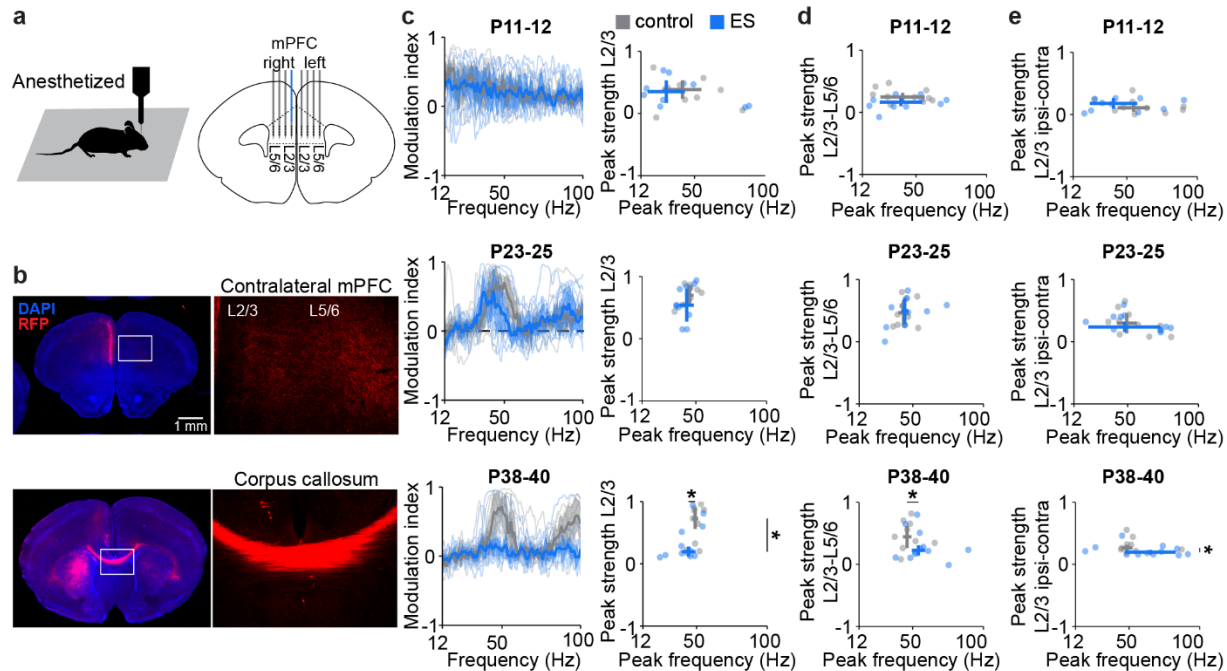

344

345 **Extended Data Fig. 5. Transient early stimulation impairs evoked intra- and**  
 346 **interhemispheric synchrony in the adult mPFC.** (a) Schematic displaying bilateral multi-shank  
 347 recordings in the mPFC of anesthetized mice. (b) Representative photographs showing axonal  
 348 projections of Chr2(ET/TC)-RFP-transfected L2/3 PYRs in coronal slices from a P10 mouse. (c)  
 349 Left, modulation index of LFP power in response to acute ramp light stimulation (473 nm, 3 s) for  
 350 control and ES mice at P11-12 (control n=10 recordings, 10 mice, ES n=10 recordings, 10 mice),  
 351 P23-25 (control n=10 recordings, 10 mice, ES n=11 recordings, 11 mice) and P38-40 (control n=9  
 352 recordings, 9 mice, ES n=12 recordings, 12 mice). Right, scatter plots displaying the peak strength  
 353 and peak frequency of the power modulation index for control and ES mice. (Wilcoxon rank, P11-  
 354 12, peak frequency p=0.520, peak strength p=0.909, P23-25, peak frequency p=0.290, peak  
 355 strength p=0.459, P38-40, peak frequency p=0.039, peak strength p=0.025). (d) Scatter plots  
 356 displaying the peak strength and peak frequency of prefrontal L2/3-L5/6 coherence at different  
 357 age. (Wilcoxon rank, P11-12, peak frequency p=1.000, peak strength p=0.053, P23-25, peak  
 358 frequency p=0.943, peak strength p=0.915, P38-40, peak frequency p=0.042, peak strength  
 359 p=0.069). (e) Scatter plots displaying the peak strength and peak frequency of interhemispheric  
 360 prefrontal L2/3-L2/3 coherence at different age. (Wilcoxon rank, P11-12, peak frequency p=0.212,  
 361 peak strength p=0.623, P23-25, peak frequency p=0.832, peak strength p=0.915, P38-40, peak  
 362 frequency p=0.270, peak strength p=0.036). Asterisks (\* p<0.05, \*\* p<0.01, \*\*\* p<0.001) indicate  
 363 significant differences (see Extended Data Tab. 1 for detailed statistics).

364

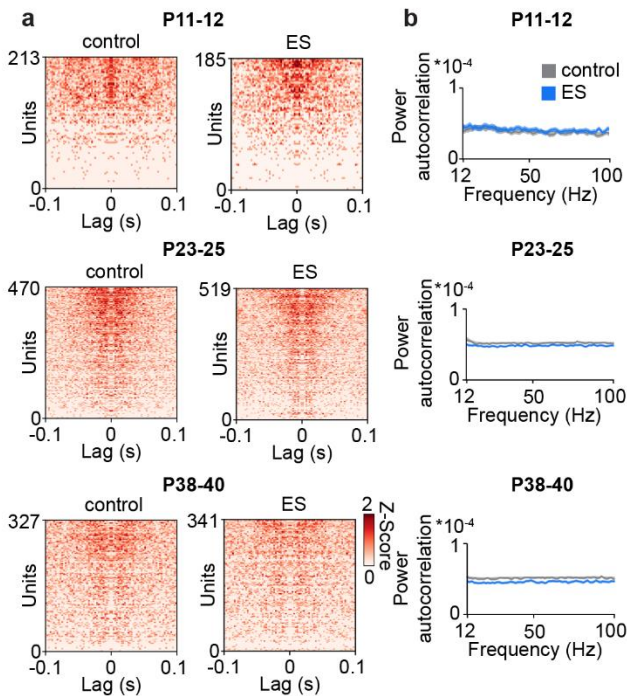

365

366 **Extended Data Fig. 6. Transient early stimulation does not affect the rhythmicity of single**  
367 **units in the mPFC during spontaneous activity.** (a) Z-scored autocorrelations for single units  
368 before acute ramp light stimulation arranged by magnitude for control and ES mice at P11-12  
369 (control n=213 units, 11 mice, ES n=185 units, 10 mice), P23-25 (control n=470 units, 6 mice, ES  
370 n=519 units, 5 mice) and P38-40 (control n=327 units, 5 mice, ES n=341 units, 5 mice). (b)  
371 Average power of single unit autocorrelations before acute ramp light stimulation for control and  
372 ES mice at different age. (See Extended Data Tab. 1 for detailed statistics).

373

374 To assess the impact of early stimulation on the synchrony within the prefrontal  
375 network during development, we calculated pairwise correlations of single units. During  
376 spontaneous activity, pairwise correlations between prefrontal units were similar for  
377 control and ES mice at P11-12 and P38-40, whereas correlation at the 3<sup>rd</sup> quartile was  
378 slightly reduced in ES mice at P23-25 (Extended data Fig. 7). In contrast, during ramp  
379 light stimulations, the pairwise correlations were significantly reduced at the 3<sup>rd</sup> quartile in  
380 young adult ES mice when compared to controls, but comparable between groups at P11-  
381 12 and P23-25. These data show that the synchrony of the highest correlated units in the  
382 mPFC is reduced in young adult ES mice.

383 Taken together, these results show that transiently increased activity at neonatal  
384 age diminishes prefrontal gamma band synchronization in response to stimulation at adult  
385 age.

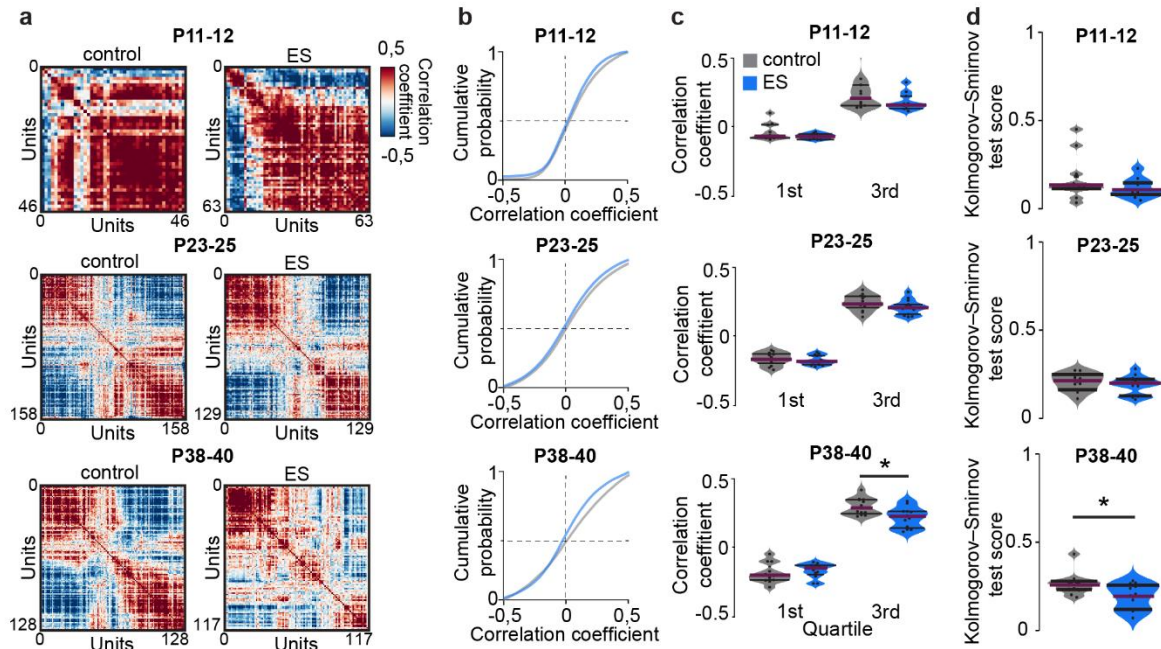

386

387 **Fig. 6. Transient early stimulation reduces synchrony of highly correlated units in**  
 388 **response to acute light stimulation in the adult mPFC. (a)** Representative pairwise  
 389 correlations of L2/3 single units during acute ramp light stimulation (473 nm, 3 s) for a control (left)  
 390 and ES mouse (right) at different developmental stages. **(b)** Average cumulative density functions  
 391 of pairwise correlations during acute ramp light stimulation for control and ES mice at P11-12  
 392 (control n=11 recordings, 11 mice, ES n=10 recordings, 10 mice), P23-25 (control n=13  
 393 recordings, 6 mice, ES n=14 recordings, 5 mice) and P38-40 (control n=12 recordings, 5 mice,  
 394 ES n=12 recordings, 5 mice). **(c)** Average intercept at 1<sup>st</sup> and 3<sup>rd</sup> quartile of correlation coefficients  
 395 during acute ramp light stimulation for control and ES mice at different age. (Wilcoxon rank, P11-  
 396 12, 1<sup>st</sup> quartile p=0.385, 3<sup>rd</sup> quartile p=0.162, LMEM, P23-25, 1<sup>st</sup> quartile p=0.470, 3<sup>rd</sup> quartile  
 397 p=0.315, P38-40, 1<sup>st</sup> quartile p=0.537, 3<sup>rd</sup> quartile p=0.019). **(d)** Kolmogorov-Smirnov test score  
 398 of the distance between pre and stim cumulative density function of correlation coefficients for  
 399 control and ES mice. (Wilcoxon rank, P11-12, p=0.418, LMEM, P23-25, p=0.631, P38-40,  
 400 p=0.033). Asterisks (\* p<0.05, \*\* p<0.01, \*\*\* p<0.001) indicate significant differences (see  
 401 Extended Data Tab. 1 for detailed statistics).

402



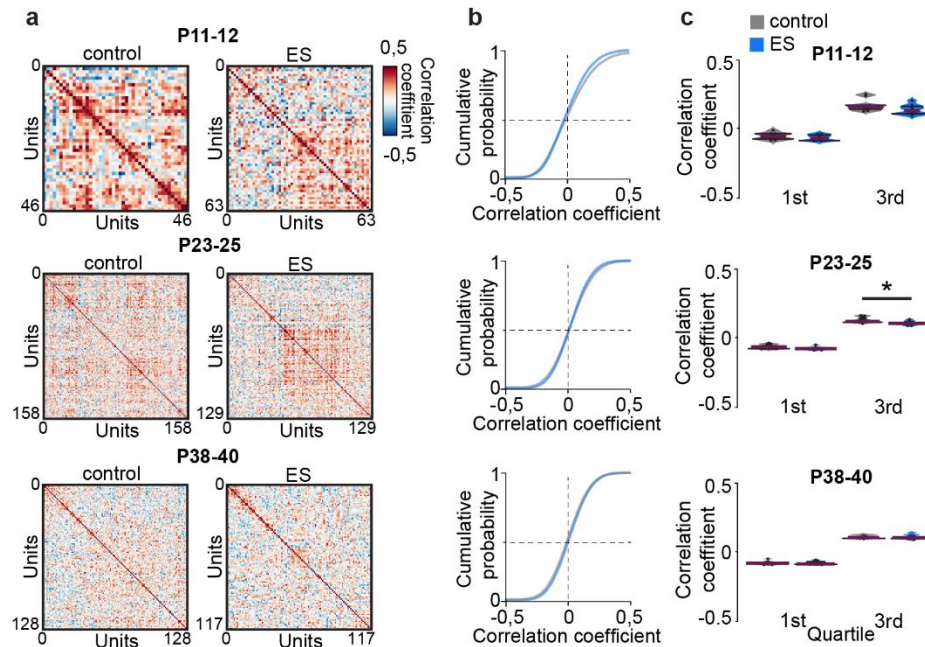

403

404 **Extended Data Fig. 7. Transient early stimulation mildly affects network synchrony during**  
 405 **spontaneous activity in the mPFC.** (a) Representative pairwise correlations of L2/3 single units  
 406 before acute ramp light stimulation for a control (left) and ES mouse (right) at different  
 407 developmental stages. (b) Average cumulative density functions of pairwise correlations before  
 408 acute ramp light stimulation for control and ES mice at P11-12 (control n=11 recordings, 11 mice,  
 409 ES n=10 recordings, 10 mice), P23-25 (control n=13 recordings, 6 mice, ES n=14 recordings, 5  
 410 mice) and P38-40 (control n=12 recordings, 5 mice, ES n=12 recordings, 5 mice). (c) Average  
 411 intercept at 1<sup>st</sup> and 3<sup>rd</sup> quartile of correlation coefficients before acute ramp light stimulation for  
 412 control and ES mice at different age. (Wilcoxon rank, P11-12, 1<sup>st</sup> quartile p=0.241, 3<sup>rd</sup> quartile  
 413 p=0.104, LMEM, P23-25, 1<sup>st</sup> quartile p=0.100, 3<sup>rd</sup> quartile p=0.036, P38-40, 1<sup>st</sup> quartile p=0.970,  
 414 3<sup>rd</sup> quartile p=0.911). Asterisks (\* p<0.05, \*\* p<0.01, \*\*\* p<0.001) indicate significant differences  
 415 (see Extended Data Tab. 1 for detailed statistics).

## 416 Transient increase of neonatal activity alters excitation/inhibition balance in the 417 adult mPFC

418 Network synchronization in gamma frequency results from interactions between  
 419 excitatory and inhibitory units<sup>36,37</sup>. To elucidate the mechanisms of abnormal network  
 420 synchronization upon stimulation in ES mice, we analyzed the response of individual units  
 421 in L2/3 of the mPFC to acute ramp light stimulations. At P11-12, 25.3% of units in control  
 422 mice and 20.3% of units in ES mice significantly increased their firing rate during ramp  
 423 light stimulation. Only few units (control 0.9%, ES 3.4%) decreased their firing rates. In  
 424 older mice, units with significantly increased (P23-25, control 31.2%, ES 32.7%; P38-40,  
 425 control 33.7%, ES 25.5%) and decreased (P23-25, control 27.0%, ES 23.6%; P38-40,



426 control 24.5%, ES 30.6%) firing rates were detected (Fig. 7a,b). The ratio of activated vs.  
427 inactivated neurons per mouse was similar across groups at P11-12 and P23-25, yet  
428 significantly reduced in ES mice at P38-40 compared to controls.

429         Decreased gamma synchrony and stronger inhibition in P38-40 ES mice suggest  
430 that the transient increase of prefrontal activity at neonatal age causes long-term  
431 alterations of the balance between excitation and inhibition in the prefrontal circuitry. To  
432 test this hypothesis, we performed whole-cell patch-clamp recordings from non-  
433 transfected prefrontal L2/3 PYRs in coronal slices from control and ES mice. During acute  
434 light stimulation of ChR2(ET/TC)-transfected L2/3 PYRs (473 nm, square pulse, 1 s) the  
435 ratio of excitatory postsynaptic currents (EPSCs) to inhibitory postsynaptic currents  
436 (IPSCs) in non-transfected L2/3 PYRs was shifted towards inhibition for P38-40 ES mice  
437 compared to controls (Fig. 7c). In contrast, the ratio was similar between groups at  
438 younger age. Basic active and passive membrane properties as well as spontaneous  
439 inputs were not affected in ES mice (Fig. 7c, Extended Data Fig. 8).

440

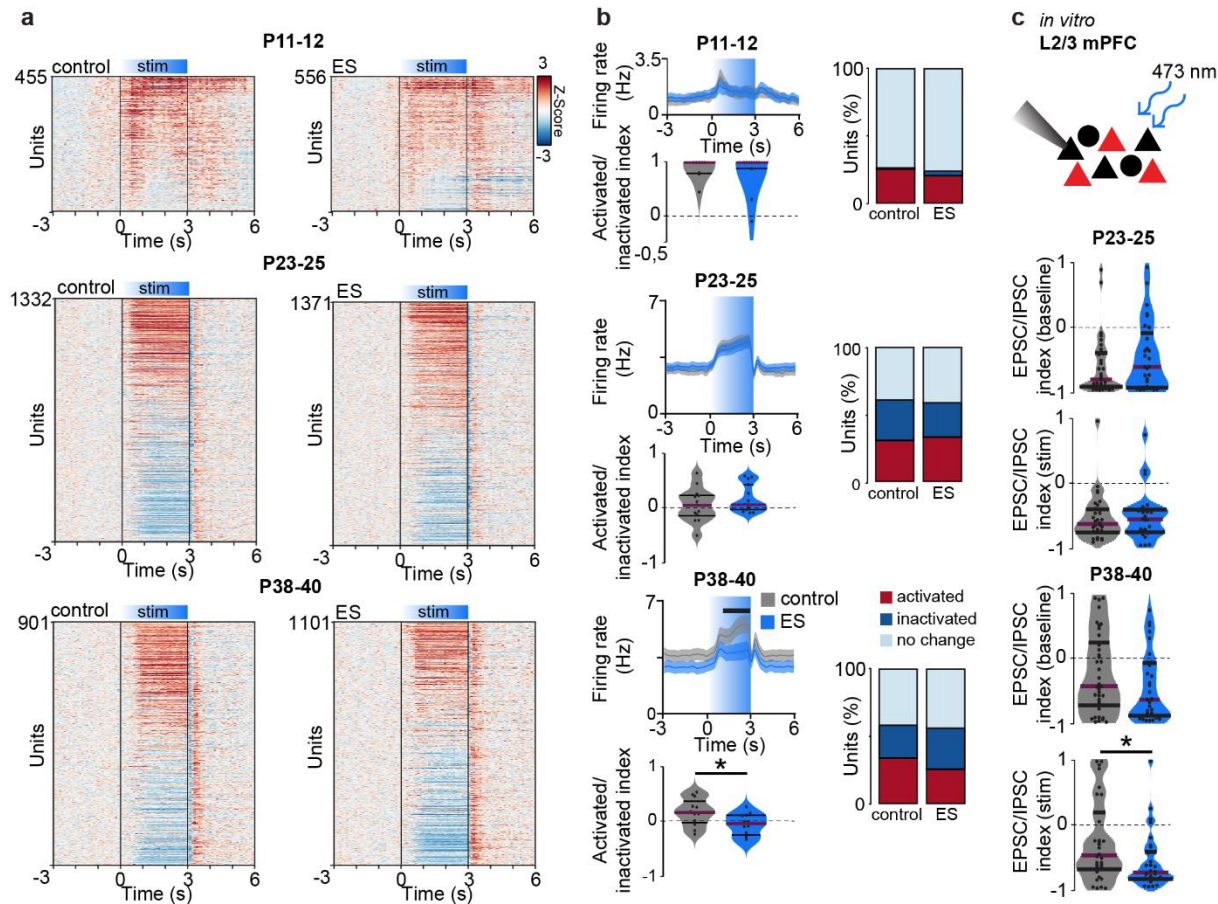

441

442 **Fig. 7. Transient early stimulation alters excitation/inhibition balance in the adult mPFC**  
 443 **during acute light stimulation.** (a) Single unit firing rates z-scored to pre-stimulation in response  
 444 to acute ramp light stimulation (473 nm, 3 s) displayed for control (left) and ES mice (right) at P11-  
 445 12 (control n=455 units, 11 mice, ES n=556 units, 10 mice), P23-25 (control n=1332 units, 6 mice,  
 446 ES n=1371 units, 5 mice) and P38-40 (control n=901 units, 5 mice, ES n=1101 units, 5 mice). (b)  
 447 Line plots displaying average firing rates during acute light stimulations (top left), violin plots  
 448 showing the index of significantly activated vs. inactivated units (bottom left) and bar diagrams of  
 449 the percentage of significantly activated and inactivated units for control and ES mice at P11-12,  
 450 P23-25 and P38-40. (P11-12, LMEM, firing rate  $p < 0.001$ , Wilcoxon rank, activated/inactivated  
 451 index  $p = 0.982$ , LMEM, P23-25, firing rate  $p = 0.004$ , activated/inactivated index  $p = 0.317$ , P38-40,  
 452 firing rate  $p < 0.001$ , activated/inactivated index  $p = 0.033$ ). (c) Top, schematic showing the protocol  
 453 for *in vitro* whole-cell patch-clamp recordings from non-transfected L2/3 PYRs (black) during  
 454 optogenetic stimulation of neighboring transfected cells (red) in the mPFC. Bottom, violin plots  
 455 displaying EPSC/IPSC index during baseline and acute light stimulation (473 nm, square pulse,  
 456 1 s) for control and ES mice at P23-25 (control n=35 neurons, 5 mice, ES n=30 neurons, 5 mice)  
 457 and P38-40 (control n=41 neurons, 6 mice, ES n=33 neurons, 4 mice). (LMEM, P23-25, baseline  
 458  $p = 0.218$ , stim  $p = 0.840$ , P38-40, baseline  $p = 0.402$ , stim  $p = 0.030$ ). Black lines and asterisks (\*  
 459  $p < 0.05$ , \*\*  $p < 0.01$ , \*\*\*  $p < 0.001$ ) indicate significant differences (see Extended Data Tab. 1 for  
 460 detailed statistics).

461

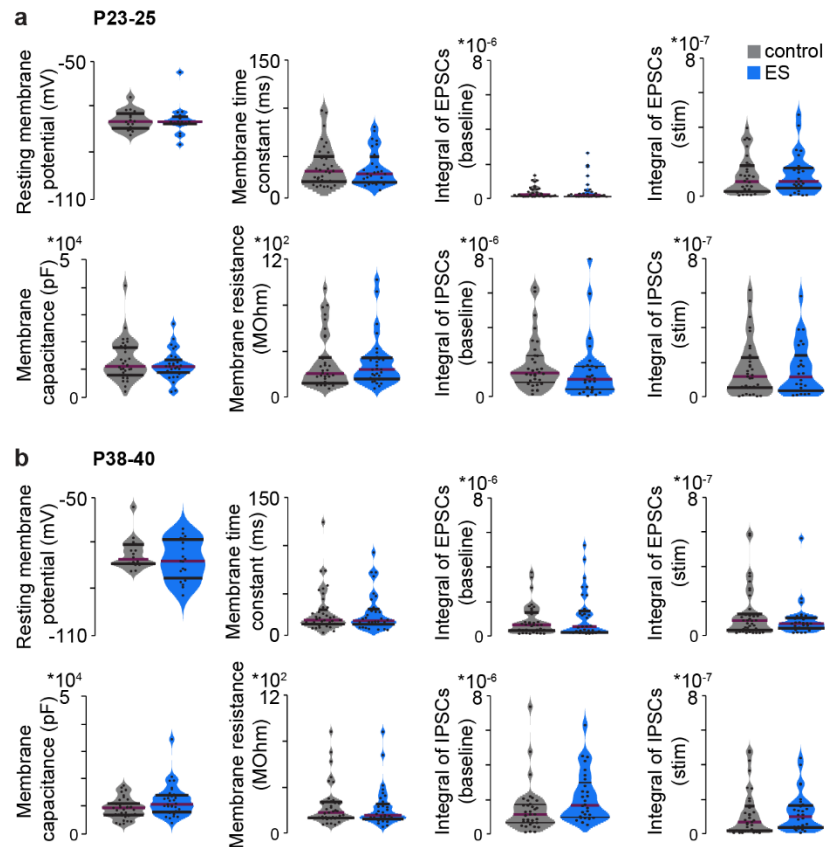

462

463 **Extended Data Fig. 8. Transient early stimulation does not alter the passive and active**  
464 **membrane properties of non-transfected L2/3 PYRs.** (a) Violin plots displaying passive and  
465 active membrane properties as well as properties of EPSCs and IPSCs induced by light  
466 stimulation in non-transfected L2/3 PYRs from control and ES mice at P23-25 (control n=35  
467 neurons, 5 mice, ES n=30 neurons, 5 mice). (LMEM, resting membrane potential p=0.545,  
468 membrane time constant p=0.426, EPSCs baseline p=0.743, EPSCs stim p=0.415 membrane  
469 capacitance p=0.218, membrane resistance p=0.564, IPSCs baseline p=0.234, IPSCs stim  
470 p=0.881). (b) Same as (a) for control and ES mice at P38-40 (control n=41 neurons, 6 mice, ES  
471 n=33 neurons, 4 mice). (LMEM, resting membrane potential p=0.526, membrane time constant  
472 p=0.907, EPSCs baseline p=0.339, EPSCs stim p=0.349 membrane capacitance p=0.304,  
473 membrane resistance p=0.436, IPSCs baseline p=0.332, IPSCs stim p=0.309). (See Extended  
474 Data Tab. 1 for detailed statistics).

475 Stronger inhibition might result from a higher survival rate of interneurons after  
476 transient activity increase during neonatal age<sup>38</sup>. To test this hypothesis, we performed  
477 immunohistochemical stainings for parvalbumin (PV) and somatostatin (SOM) and  
478 quantified the distribution of these two distinct subsets of inhibitory interneurons in the  
479 mPFC of control and ES mice during development. The density of SOM-positive neurons  
480 was significantly reduced, whereas the density of PV-positive neurons was significantly  
481 increased at P38-40 (Extended Data Fig. 9).

482 Fast-spiking (FS) PV-expressing interneurons that mature towards the end of the  
483 developmental period are critical for the generation of adult cortical gamma activity<sup>36,39</sup>.  
484 Therefore, the late emerging decrease of gamma synchrony in adult ES mice may result  
485 from disruption of these neurons. To test this hypothesis, we distinguished regular spiking  
486 (RS) and FS units in extracellular recordings from control and ES mice based on their  
487 spike waveform (Fig. 8a). This distinction revealed that the spontaneous firing rate of RS  
488 units is altered in ES mice at P23-25 and P38-40 compared to controls, whereas no  
489 changes were detected for FS units. In contrast, evoked activity during acute ramp light  
490 stimulation was reduced for RS and FS units in ES mice at P38-40, but normal earlier  
491 during development (Fig. 8c). Reduced evoked activity of FS units seems to be in  
492 opposition with the increased numbers of PV-positive neurons in adult ES mice. However,  
493 the FS firing rate is mainly reduced during the late phase of the ramp, whereas the initial  
494 peak is not altered. Taking into account that PV neurons inhibit pyramidal neurons but  
495 also other PV neurons<sup>40</sup>, we hypothesize that FS putatively PV neurons provide more  
496 potent inhibition and thereby reduce RS and FS firing rates after initial activation in ES  
497 mice.

498 Gamma synchronization in the adult cortex results from temporally coordinated  
499 excitatory drive and inhibitory feedback<sup>37,39</sup>. To investigate the timing of RS and FS firing,  
500 we performed acute stimulations with short light pulses of 3 ms duration. RS and FS units  
501 showed a pronounced peak in their firing rate for 5-10 ms in response to short light pulses  
502 (Fig. 8d). The similar peak time of RS and FS units indicates that the RS cluster contains  
503 a substantial number of non-transfected, indirectly activated units, in agreement with the  
504 sparse transfection achieved with IUE. FS units in control mice showed a second peak in  
505 their firing rate about 20 ms after the light pulse in P23-25 and P38-40 mice. The delay of  
506 20 ms suggest the contribution of these units to gamma oscillations that have a typical  
507 cycle duration of 20 ms at 50 Hz. This second peak was significantly reduced in ES mice  
508 at P23-25 and P38-40. Of note, similar to ramp induced activity, the first peak was not  
509 affected for FS units, indicating that FS units provide stronger inhibition after initial  
510 activation in ES mice.

511 Thus, transiently increased activity at neonatal age alters the development of  
 512 inhibitory feedback from FS interneurons and thereby, reduces evoked gamma  
 513 synchronization of adult prefrontal circuits.

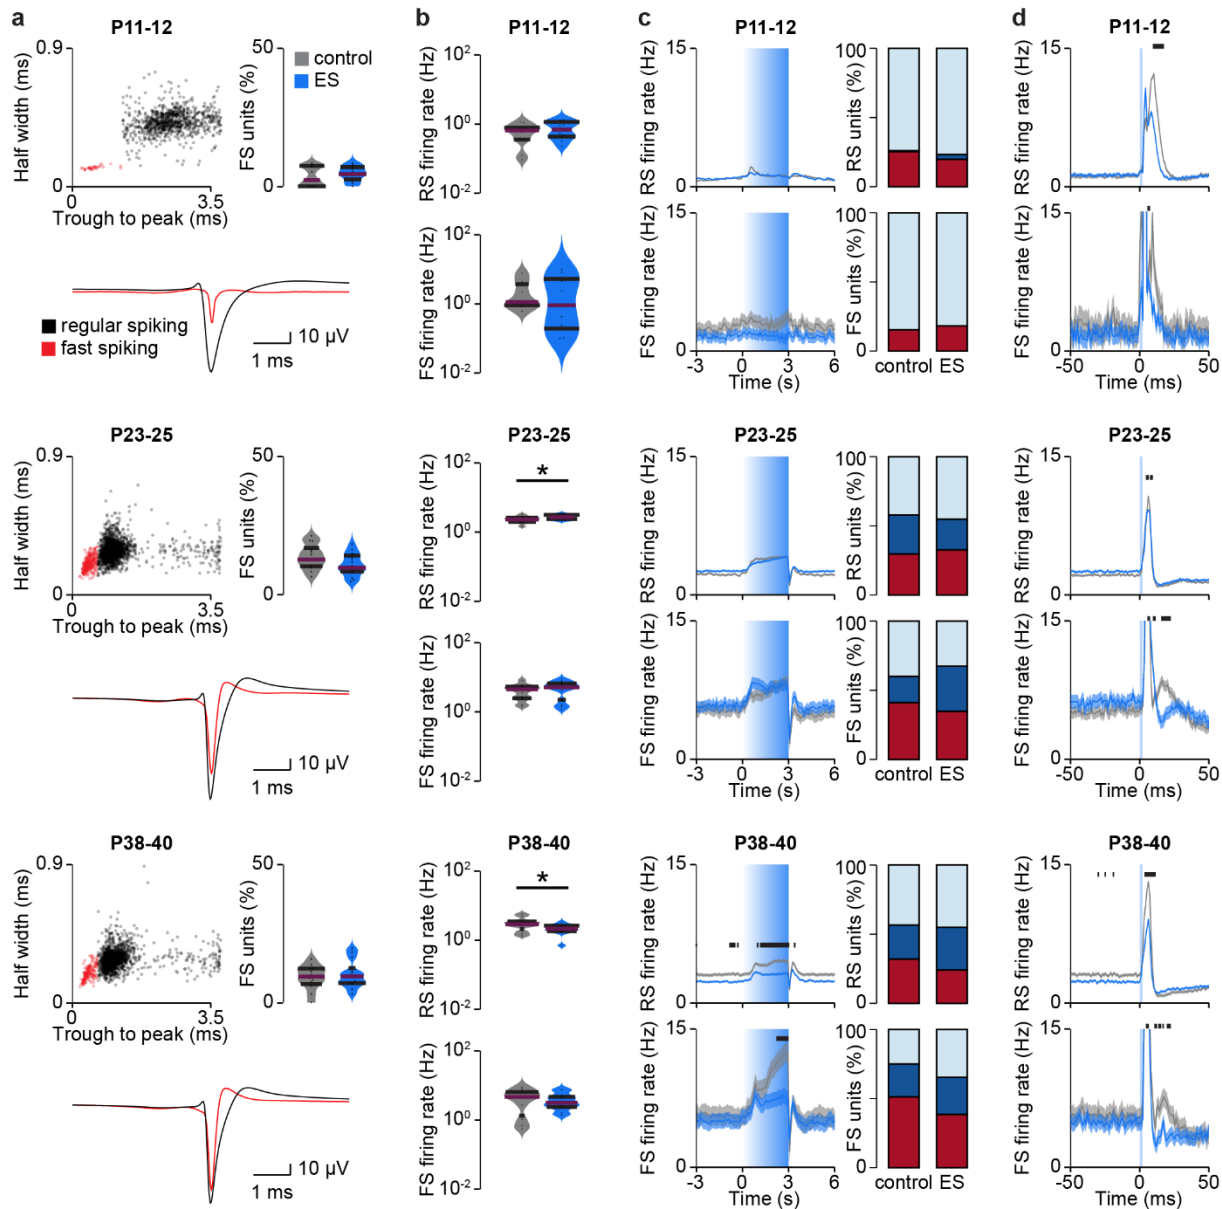

514

515 **Fig. 8. Transient early stimulation alters evoked inhibitory feedback from fast spiking units**  
 516 **in the mPFC.** (a) Scatter plots displaying half width and trough to peak duration (top left), average  
 517 waveforms for RS and FS units (bottom), as well as percent of FS units for control and ES mice  
 518 at P11-12 (control 428 RS and 13 FS units, 11 mice, ES 475 RS and 22 FS units, 10 mice), P23-  
 519 25 (control 1140 RS and 185 FS units, 6 mice, ES 1220 RS and 141 FS units, 5 mice) and P38-  
 520 40 (control 814 RS and 84 FS units, 5 mice, ES 992 RS and 104 FS units, 5 mice). (Wilcoxon



521 rank, P11-12  $p < 0.500$ , LMEM, P23-25  $p = 0.114$ , P38-40  $p = 0.551$ ). (b) Violin plots displaying  
 522 spontaneous firing rate of RS and FS units for control and ES mice at P11-12, P23-25 and P38-  
 523 40. (Wilcoxon rank, P11-12, RS firing rate  $p = 0.418$ , FS firing rate  $p = 0.680$ , LMEM, P23-25, RS  
 524 firing rate  $p = 0.020$ , FS firing rate  $p = 0.357$ , P38-40, RS firing rate  $p = 0.040$ , FS firing rate  $p = 0.575$ ).  
 525 (c) Average firing rate during acute ramp light stimulation (473 nm, 3 s) and percent of significantly  
 526 modulated units for control and ES mice at P11-12, P23-25 and P38-40. (LMEM, P11-12, RS  
 527 firing rate  $p < 0.001$ , FS firing rate  $p < 0.001$ , P23-25, RS firing rate  $p < 0.001$ , FS firing rate  $p < 0.001$ ,  
 528 P38-40, RS firing rate  $p < 0.001$ , FS firing rate  $p < 0.001$ ). (d) Average firing rate during acute pulse  
 529 light stimulation (473 nm, 3 ms) for control and ES mice at P11-12, P23-25 and P38-40. (LMEM,  
 530 P11-12, RS firing rate  $p < 0.001$ , FS firing rate  $p < 0.001$ , P23-25, RS firing rate  $p < 0.001$ , FS firing  
 531 rate  $p < 0.001$ , P38-40, RS firing rate  $p < 0.001$ , FS firing rate  $p < 0.001$ ). Black lines and asterisks (\*  
 532  $p < 0.05$ , \*\*  $p < 0.01$ , \*\*\*  $p < 0.001$ ) indicate significant differences (see Extended Data Tab. 1 for  
 533 detailed statistics).

534

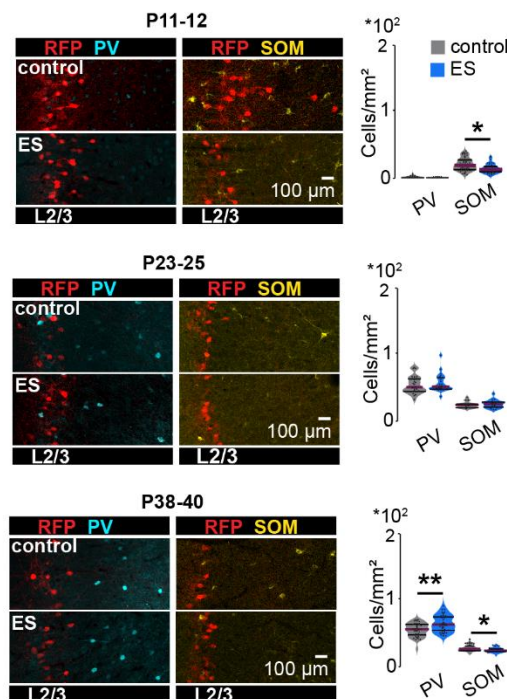

535

536 **Extended Data Fig. 9. Transient early stimulation alters the density of SOM- and PV-**  
 537 **expressing interneurons in the mPFC.** Left, representative images showing PV and SOM  
 538 immunostainings in the mPFC of control and ES mice at P11-12, P23-25 and P38-40. Right, violin  
 539 plots displaying the density of PV-positive and SOM-positive neurons in L2/3 of the mPFC of  
 540 control and ES mice at P11-12 (control: PV  $n = 54$  slices, 12 mice, SOM  $n = 59$  slices, 12 mice; ES,  
 541 PV  $n = 38$  slices, 9 mice, SOM  $n = 43$  slices, 9 mice), P23-25 (control: PV  $n = 25$  slices, 5 mice, SOM  
 542  $n = 25$  slices, 5 mice; ES, PV  $n = 27$  slices, 6 mice, SOM  $n = 25$  slices, 6 mice) and P38-40 (control:  
 543 PV  $n = 36$  slices, 9 mice, SOM  $n = 36$  slices, 9 mice; ES, PV  $n = 40$  slices, 10 mice, SOM  $n = 43$   
 544 slices, 11 mice). (LMEM, P11-12, PV  $p = 0.296$ , SOM  $p = 0.044$ , P23-25, PV  $p = 0.403$ , SOM  $p = 0.390$ ,  
 545 P38-40, PV  $p = 0.012$ , SOM  $p = 0.012$ ). Asterisks (\*  $p < 0.05$ , \*\*  $p < 0.01$ , \*\*\*  $p < 0.001$ ) indicate  
 546 significant differences (see Extended Data Tab. 1 for detailed statistics).

547

548 **Discussion**

549 Seminal research identified electrical activity as a major contributor to the development  
550 of the mammalian cerebral cortex. Early activity influences neuronal migration,  
551 differentiation, and apoptosis<sup>19-21</sup> as well as the establishment of synaptic  
552 connections<sup>41,42</sup>. Also in clinical settings, patterns of electroencephalographic activity of  
553 preterm infants provide prognostic value for neurodevelopmental outcome<sup>43</sup>. Several  
554 neuropsychiatric diseases have been proposed to be related to alterations in neuronal  
555 activity early in life<sup>8,44</sup>. However, fundamental questions still need to be addressed: how  
556 does electrical activity during early development impact adult cortical function? Does  
557 altered prefrontal activity during early development contribute to cognitive deficits later in  
558 life? Here, we address these questions and demonstrate that a transient increase of  
559 activity in the mouse mPFC during a short period of neonatal development critical for  
560 network formation causes long-lasting changes in inhibitory feedback and  
561 excitation/inhibition balance, leading to weaker evoked gamma band synchronization and  
562 ultimately, poorer cognitive abilities.

563 To manipulate developmental activity, we optogenetically stimulated the mPFC,  
564 inducing discontinuous activity patterns with similar dynamics as the ones spontaneously  
565 occurring. During early development the mammalian cortex shows discontinuous activity,  
566 with neuronal discharges organized in oscillatory rhythms alternating with electrically  
567 silent periods<sup>45,46</sup>. In the mPFC of neonatal mice, these 1-3 s-long oscillatory events with  
568 frequencies alternating between theta (4-12 Hz) and beta-low gamma (12-40 Hz) occur  
569 every 20-30 s<sup>22,27</sup>. The fast oscillations emerge as result of L2/3 PYRs activation<sup>26</sup>.  
570 Therefore, we used repeated ramp light stimulations (3 s duration, 6/min for 30 min) to  
571 activate L2/3 PYRs transfected with ChR2(ET/TC) by IUE and induced fast oscillatory  
572 discharges. At the age of transient early stimulation (P7-11), neurons have reached their  
573 final location in the cortical layers and are in the process of establishing synaptic  
574 connections<sup>18,47</sup>. Our stimulation protocol was designed to cause a modest increase of  
575 activity in the mPFC during this period critical for network formation. The stimulation not  
576 only augmented the level of activity but coordinated the prefrontal networks in fast  
577 oscillatory rhythms evolving from beta to gamma frequencies with age<sup>35</sup>. A causal link

578 between this rhythmic organization and the long-term effects of transient early stimulation  
579 is still missing.

580         How does the transient increase of neuronal activity at neonatal age influence  
581 prefrontal development and ultimately behavior? The present data demonstrate that the  
582 early manipulation triggers a cascade of structural and functional changes in the mPFC  
583 leading to the impairment of cognitive abilities. On the morphological level, increased  
584 neonatal activity induced premature growth of dendrites in stimulated L2/3 PYRs. This is  
585 consistent with the activity-dependent growth of dendrites<sup>48</sup> and reminiscent of the growth  
586 dynamics (i.e. initially excessive followed by arrested growth) during development in  
587 humans with autism spectrum disorders<sup>49</sup>. Activity of pyramidal neurons from P5 to P8  
588 has been shown to regulate the survival of cortical interneurons<sup>38,50</sup>. Accordingly, we  
589 found an increased number of PV-expressing interneurons in ES mice. In contrast to  
590 previous studies<sup>29,38,50</sup>, this effect was specific for PV-expressing neurons, whereas the  
591 number of SOM-expressing neurons was reduced. Several differences in the  
592 experimental settings might explain this disparity: (1) Stimulation a few days later during  
593 developmental (P7-11 vs. P5-8) is expected to have a stronger effect on late maturing  
594 PV-expressing interneurons<sup>29</sup>; (2) Increased activity of a subset of pyramidal neurons  
595 (L2/3 PYRs vs. all PYRs) might cause different activation of interneuron subtypes; (3)  
596 Optogenetic (vs. chemogenetic) stimulation triggering fast oscillatory network activity  
597 might specifically engage PV-expressing interneurons.

598         Premature growth of dendrites likely affects the connectivity of stimulated neurons.  
599 Together with altered interneuron numbers, these structural changes led to a shift in the  
600 excitation/inhibition balance in the mPFC of ES mice towards inhibition. In addition to the  
601 general increase in inhibition, the timing of FS, presumably PV-expressing interneurons,  
602 was altered. In juvenile and adult control mice, brief activation of L2/3 PYRs induced a  
603 sharp peak in the firing rate of FS interneurons followed by a second peak about 20 ms  
604 later. This second peak, supposedly critical for synchronization in gamma frequency, was  
605 absent in ES mice. Accordingly, the transient increase of neuronal activity at neonatal  
606 age led to impaired synchronization of the prefrontal network in gamma frequency in  
607 young adults. This is consistent with the importance of PV-expressing FS interneurons  
608 for the generation of cortical gamma activity<sup>37,39</sup>. The late maturation of PV-expressing

609 interneurons<sup>29</sup> and gamma activity in the mPFC<sup>35</sup> most likely underlie the delayed onset  
610 of these physiological effects. Of note, these effects were only evident during evoked  
611 activity, whereas spontaneous activity in the mPFC was largely normal, reflecting the  
612 moderate effects of stimulation protocol. This is consistent with alterations in evoked  
613 activity related to the early emergence of sensory symptoms in humans with autism  
614 spectrum disorders<sup>44</sup>.

615 Abnormal FS interneuron development impairs prefrontal gamma activity and  
616 cognitive flexibility in adults<sup>51</sup>. Accordingly, transient increase of neuronal activity at  
617 neonatal age ultimately resulted in impaired cognitive abilities in juvenile and young adult  
618 mice. Gamma activity in prefrontal L2/3 is particularly important for the maintenance of  
619 information during working memory tasks<sup>52</sup>. This is consistent with the specific impairment  
620 of ES mice in short-term memory and working memory tasks, as well as reduced social  
621 preference.

622 In conclusion, these data demonstrate that altered neuronal activity during early  
623 development induces structural and functional changes in the mPFC, ultimately resulting  
624 in impaired cognitive abilities. Even though cognitive symptoms are not the core deficits,  
625 they represent a devastating burden in neuropsychiatric diseases<sup>3-5</sup>. Altered cortical  
626 excitation/inhibition balance and impaired gamma activity are critical for cognitive  
627 dysfunctions<sup>53-55</sup>. Thus, altered developmental activity of cortical circuits might actively  
628 contribute to cognitive symptoms in neuropsychiatric diseases<sup>14-18</sup>.

629 Furthermore, the mechanisms described here might explain cognitive difficulties  
630 of preterm born humans experiencing excessive sensory stimulation in neonatal intensive  
631 care units (NICUs) (frequent handling associated with medical or nursing care, excessive  
632 noise and light levels) at a comparable stage of brain development (2nd-3rd gestational  
633 trimester)<sup>56</sup>. These stressful stimuli might trigger premature neuronal activity, perturbing  
634 the activity-dependent maturation of cortical networks<sup>57</sup>. Frontal regions are particularly  
635 vulnerable to conditions in NICUs<sup>58</sup>. Correspondingly, preterm children are highly prone  
636 to frontally confined impairment, such as memory and attention deficits<sup>59</sup>. Thus, our  
637 findings lend experimental proof to the concept that neuronal activity during early  
638 development accounts for adult cortical function and cognitive performance, playing a  
639 critical role in neurodevelopmental and neuropsychiatric diseases<sup>12,14,17</sup>.

640 **Methods**

641 ***Animals***

642 All experiments were performed in compliance with the German laws and the guidelines  
643 of the European Community for the use of animals in research and were approved by the  
644 local ethical committee (G132/12, G17/015, N18/015). Experiments were carried out on  
645 C57Bl/6J mice of both sexes. Timed-pregnant mice from the animal facility of the  
646 University Medical Center Hamburg-Eppendorf were housed individually at a 12 h  
647 light/12 h dark cycle and were given access to water and food ad libitum. The day of  
648 vaginal plug detection was considered E0.5, the day of birth was considered P0.

649 ***In utero electroporation***

650 Pregnant mice received additional wet food daily, supplemented with 2-4 drops Metacam  
651 (0.5 mg/ml, Boehringer-Ingelheim, Germany) one day before until two days after IUE. At  
652 E15.5, pregnant mice were injected subcutaneously with buprenorphine (0.05 mg/kg body  
653 weight) 30 min before surgery. Surgery was performed under isoflurane anesthesia  
654 (induction 5%, maintenance 3.5%) on a heating blanket. Eyes were covered with eye  
655 ointment and pain reflexes and breathing were monitored to assess anesthesia depth.  
656 Uterine horns were exposed and moistened with warm sterile phosphate-buffered saline  
657 (PBS). 0.75-1.25  $\mu$ l of opsin- and fluorophore-encoding plasmid (pAAV-CAG-  
658 ChR2(E123T/T159C)-2A-tDimer2, 1.25  $\mu$ g/ $\mu$ l) purified with NucleoBond (Macherey-  
659 Nagel, Germany) in sterile PBS with 0.1% fast green dye was injected in the right lateral  
660 ventricle of each embryo using pulled borosilicate glass capillaries. Electroporation  
661 tweezer paddles of 5 mm diameter were oriented at a rough 20° leftward angle from the  
662 midline of the head and a rough 10° downward angle from the anterior to posterior axis  
663 to transfect precursor cells of medial prefrontal L2/3 PYRs with 5 electroporation pulses  
664 (35 V, 50 ms, 950 ms interval, CU21EX, BEX, Japan). Uterine horns were placed back  
665 into the abdominal cavity that was filled with warm sterile PBS. Abdominal muscles and  
666 skin were sutured with absorbable and non-absorbable suture thread, respectively. After  
667 recovery from anesthesia, mice were returned to their home cage, placed half on a  
668 heating blanket for two days after surgery. Fluorophore expression in pups was detected



669 at P2 with a portable fluorescence flashlight (Nightsea, MA, USA) through the intact skin  
670 and skull and confirmed in brain slices postmortem.

### 671 ***Transient early stimulation***

672 A stimulation window was made at P7 for chronic transcranial optogenetic stimulation in  
673 mice transfected by in utero electroporation. Mice were placed on a heating blanket and  
674 anesthetized with isoflurane (5% induction, 2% maintenance). Breathing and pain  
675 reflexes were monitored to assess anesthesia depth. The skin above the skull was cut  
676 along the midline at the level of the mPFC and gently spread with forceps. The exposed  
677 skull was covered with transparent tissue adhesive (Surgibond, SMI, Belgium). Mice were  
678 returned to the dam in the home cage after recovery from anesthesia. From P7-11 mice  
679 were stimulated daily under isoflurane anesthesia (5% induction, 2% maintenance) with  
680 ramp stimulations of linearly increasing light power (473 nm wavelength, 3 s duration, 7  
681 s interval, 180 repetitions, 30 min total duration). Light stimulation was performed using  
682 an Arduino uno (Arduino, Italy) controlled laser system (Omicron, Austria) coupled to a  
683 200 µm diameter light fiber (Thorlabs, NJ, USA) positioned directly above the tissue  
684 adhesive window. Light power attenuation was set to reach 10 mW in the brain, adjusted  
685 for measured light attenuation by the tissue adhesive (~30%) and the immature skull  
686 (~25%). Control animals were treated identical but stimulated with light of 594 nm  
687 wavelength that does not activate the expressed opsin ChR2(ET/TC).

### 688 ***Electrophysiology and optogenetics in vivo***

689 *Acute extracellular recordings.* Multi-site extracellular recordings were performed  
690 unilaterally or bilaterally in the mPFC of non-anesthetized and anesthetized P7-40 mice.  
691 Under isoflurane anesthesia (induction: 5%; maintenance: 2.5%), a craniotomy was  
692 performed above the mPFC (0.5 mm anterior to bregma, 0.1-0.5 mm lateral to the  
693 midline). Mice were head-fixed into a stereotaxic apparatus using two plastic bars  
694 mounted on the nasal and occipital bones with dental cement. Multi-site electrodes  
695 (NeuroNexus, MI, USA) were inserted into the mPFC (four-shank, A4x4 recording sites,  
696 100 µm spacing, 125 µm shank distance, 1.8-2.0 mm deep). A silver wire was inserted  
697 into the cerebellum and served as ground and reference. Pups were allowed to recover  
698 for 30 min prior to recordings. For recordings in anesthetized mice, urethane (1 mg/g body

699 weight) was injected intraperitoneally prior to the surgery. Extracellular signals were band-  
700 pass filtered (0.1-9,000 Hz) and digitized (32 kHz) with a multichannel extracellular  
701 amplifier (Digital Lynx SX; Neuralynx, Bozeman, MO, USA). Electrode position was  
702 confirmed in brain slices postmortem.

703 *Chronic extracellular recordings.* Multi-site extracellular recordings were performed in the  
704 mPFC of P23-25 and P38-40 mice. Under isoflurane anesthesia (5% induction, 2.5%  
705 maintenance), a metal head-post for head fixation (Luigs and Neumann, Germany) was  
706 implanted at least 5 days before recordings. Above the mPFC (0.5-2.0 mm anterior to  
707 bregma, 0.1-0.5 mm right to the midline) a craniotomy was performed and protected by a  
708 customized synthetic window. A silver wire was implanted between skull and brain tissue  
709 above the cerebellum and served as ground and reference. 0.5% bupivacaine / 1%  
710 lidocaine was locally applied to cutting edges. After recovery from anesthesia, mice were  
711 returned to their home cage. Mice were allowed to recover from the surgery, accustomed  
712 to head-fixation and trained to run on a custom-made spinning disc. For recordings,  
713 craniotomies were uncovered and a multi-site electrode (NeuroNexus, MI, USA) was  
714 inserted into the mPFC (one-shank, A1x16 recording sites, 100  $\mu$ m spacing, 2.0 mm  
715 deep). Extracellular signals were band-pass filtered (0.1-9000 Hz) and digitized (32 kHz)  
716 with a multichannel extracellular amplifier (Digital Lynx SX; Neuralynx, Bozeman, MO,  
717 USA). Electrode position was confirmed in brain slices postmortem.

718 *Acute light stimulation.* Ramp (i.e. linearly increasing light power) light stimulation was  
719 performed using an Arduino uno (Arduino, Italy) controlled laser system (473 nm / 594  
720 nm wavelength, Omicron, Austria) coupled to a 50  $\mu$ m (4 shank electrodes) or 105  $\mu$ m (1  
721 shank electrodes) diameter light fiber (Thorlabs, NJ, USA) glued to the multisite  
722 electrodes, ending 200  $\mu$ m above the top recording site. Acute stimulations were repeated  
723 30 times.

#### 724 ***Electrophysiology and optogenetics in vitro***

725 *Patch-clamp recordings.* Whole-cell patch-clamp recordings were performed from tDimer-  
726 negative L2/3 PYRs in the mPFC of P23–25 and P38-40 mice. Under anesthesia, mice  
727 were decapitated, brains were removed and sectioned coronally at 300  $\mu$ m in ice-cold  
728 oxygenated high sucrose-based artificial cerebral spinal fluid (ACSF) (in mM: 228

729 sucrose, 2.5 KCl, 1 NaH<sub>2</sub>PO<sub>4</sub>, 26.2 NaHCO<sub>3</sub>, 11 glucose, 7 MgSO<sub>4</sub>; 310 mOsm). Slices  
730 were incubated in oxygenated ACSF (in mM: 119 NaCl, 2.5 KCl, 1 NaH<sub>2</sub>PO<sub>4</sub>, 26.2  
731 NaHCO<sub>3</sub>, 11 glucose, 1.3 MgSO<sub>4</sub>; 310 mOsm) at 37°C for 45 min before cooling to room  
732 temperature. Slices were superfused with oxygenated ACSF in the recording chamber.  
733 Neurons were patched under optical control using pulled borosilicate glass capillaries (tip  
734 resistance of 3-7 MΩ) filled with pipette solution (in mM: 130 D-gluconic acid 49-53%,  
735 130 Cesium-OH 50%, 10 HEPES, 0.5 EGTA, 4 Mg-ATP, 0.3 Na<sub>2</sub>-GTP, 8 NaCl, 5 QX-  
736 314-Cl; 285 mOsm, pH 7.3). Data was acquired using PatchMaster (HEKA Elektronik,  
737 MA, USA). Capacitance artifacts and series resistance were minimized using the built-in  
738 circuitry of the patch-clamp amplifier (EPC 10; HEKA Elektronik, MA, USA). Responses  
739 of neurons were digitized at 10 kHz in voltage-clamp mode.

740 *Light stimulation.* Square light stimuli of 472 nm wavelength and 1 s duration were  
741 delivered with the pE-2 LED system (CoolLED, Andover, UK).

## 742 ***Histology***

743 P5-40 mice were anesthetized with 10% ketamine (aniMedica, Germany) / 2% xylazine  
744 (WDT, Germany) in 0.9% NaCl (10 µg/g body weight, intraperitoneal) and transcardially  
745 perfused with 4% paraformaldehyde (Histofix, Carl Roth, Germany). Brains were removed  
746 and postfixed in 4% paraformaldehyde for 24 h. Brains were sectioned coronally with a  
747 vibratome at 50 µm for immunohistochemistry or 100 µm for examination of dendritic  
748 complexity.

749 *Immunohistochemistry.* Free-floating slices were permeabilized and blocked with PBS  
750 containing 0.8% Triton X-100 (Sigma-Aldrich, MO, USA), 5% normal bovine serum  
751 (Jackson Immuno Research, PA, USA) and 0.05% sodium azide. Slices were incubated  
752 over night with primary antibody rabbit-anti-Ca<sup>2+</sup>/calmodulin-dependent protein kinase II  
753 (1:200, #PA5-38239, Thermo Fisher, MA, USA; 1:500, #ab52476, Abcam, UK), rabbit-  
754 anti-parvalbumin (1:500, #ab11427, Abcam, UK) or rabbit-anti-somatostatin (1:250,  
755 #sc13099, Santa Cruz, CA, USA), followed by 2 h incubation with secondary antibody  
756 goat-anti-rabbit Alexa Fluor 488 (1:500, #A11008, Invitrogen-Thermo Fisher, MA, USA).  
757 Sections were transferred to glass slides and covered with Fluoromount (Sigma-Aldrich,  
758 MO, USA).

759 *Cell quantification.* Images of immunostainings and IUE-induced tDimer2 expression in  
760 the right mPFC were acquired on a confocal microscope (DM IRBE, Leica, Germany)  
761 using a 10x objective (numerical aperture 0.3). tDimer2-positive and immunopositive cells  
762 were automatically quantified with custom-written algorithms in ImageJ environment. The  
763 region of interest (ROI) was manually defined over L2/3 of the mPFC. Image contrast was  
764 enhanced before applying a median filter. Local background was subtracted to reduce  
765 background noise and images were binarized and segmented using the watershed  
766 function. Counting was done after detecting the neurons with the extended maxima  
767 function of the MorphoLibJ plugin.

768 *Dendritic complexity.* Image stacks of tDimer2-positive neurons were acquired on a  
769 confocal microscope (LSN700, Zeiss, Germany) using a 40x objective. Stacks of 6  
770 neurons per animal were acquired as 2048x2048 pixel images (voxel size 156\*156\*500  
771 nm). Dendritic complexity was quantified by Sholl analysis in ImageJ environment.  
772 Images were binarized using auto threshold function and the dendrites were traced using  
773 the semi-automatic simple neurite tracer plugin. The geometric center was identified, and  
774 the traced dendritic tree was analyzed with the Sholl analysis plugin.

## 775 ***Behavior***

776 Mice were handled and adapted to the investigation room two days prior to behavioral  
777 examination. Arenas and objects were cleaned with 0.1% acetic acid before each trial.  
778 Animals were tracked online using video Mot2 software (Video Mot2, TSE Systems  
779 GmbH, Germany) or offline using the python-based tracking system ezTrack<sup>60</sup>.

780 *Developmental milestones.* Somatic and reflex development was examined every third  
781 day in P2-20 mice. Weight, body length, and tail length were measured. Grasping reflex  
782 was assessed by touching front paws with a toothpick. Vibrissa placing was measured as  
783 head movement in response to gently touching the vibrissa with a toothpick. Auditory  
784 startle was assessed in response to finger snapping. The days of pinnae detachment and  
785 eye opening were monitored. Surface righting was measured as time to turn around after  
786 being positioned on the back (max 30 s). Cliff avoidance was measured as time until  
787 withdrawing after being positioned with forepaws and snout over an elevated edge (max

788 30 s). Bar holding was measured as time hanging on a toothpick grasped with the  
789 forepaws (max 10 s).

790 *Open field.* At P16, Mice were positioned in the center of a circular arena (34 cm in  
791 diameter) and allowed to explore for 10 min. Behavior was quantified as discrimination  
792 index of time spent in the center and the border of the arena ( $((\text{time in surround} - \text{time in center}) / (\text{time in surround} + \text{time in center}))$ ), grooming time, average velocity and number  
793 of rearing, wall rearing and jumping.  
794

795 *Object recognition.* Novel object recognition (NOR, P17), object location recognition  
796 (OLR, P18) and recency recognition (RR, P21) were performed in the same arena as the  
797 open field examination. Mouse center, tail and snout position were tracked automatically.  
798 Object interaction was defined as the snout being within <1 cm distance from an object.  
799 For NOR, each mouse explored two identical objects for 10 min during the sample phase.  
800 After a delay period of 5 min in a break box, the mouse was placed back in the arena for  
801 the test phase, where one of the objects was replaced by a novel object. Behavior was  
802 quantified as discrimination index of time spent interacting with the novel and familiar  
803 object ( $((\text{time novel object} - \text{time familiar object}) / (\text{time novel object} + \text{time familiar object}))$ ).  
804 OLR was performed similarly, but one object was relocated for the test phase instead of  
805 being exchanged. For RR, each mouse explored two identical objects during the first  
806 sample phase for 10 min, followed by a delay phase of 30 min, and a second sample  
807 phase of 10 min with two novel identical objects. After a second break of 5 min, the  
808 interaction time with an object of the first sample phase (old) and an object from the  
809 second sample phase (recent) was assessed during the test phase for 2 min. Behavior  
810 was quantified as discrimination index of time spent interacting with the novel and familiar  
811 object ( $((\text{time old object} - \text{time recent object}) / (\text{time old object} + \text{time recent object}))$ ).

812 *Maternal interaction.* Maternal interaction was performed at P21 in the same arena as the  
813 open field examination. Two plastic containers were added to the arena, one empty and  
814 one containing the dam of the investigated mouse. Small holes in the containers allowed  
815 the mouse and the dam to interact. Behavior was quantified as discrimination index of  
816 time spent interacting with the empty container and the container containing the dam  
817 ( $((\text{time dam container} - \text{time empty container}) / (\text{time dam container} + \text{time empty container}))$ ).  
818



819 *Spatial working memory.* At P36-38, mice were positioned in the center of an elevated 8-  
820 arm radial maze. 4 arms contained a food pellet at the distal end (baited). On the first day,  
821 mice were allowed to examine the maze for 20 min or until all arms were visited. During  
822 the following 10 trials (2 trials on day 1 and 4 trials on day 2 and 3), mice were allowed to  
823 examine the maze until all baited arms were visited (for max 20 min) and arm entries were  
824 assessed. Visit of a non-baited arm was considered as reference memory error, repeated  
825 visit of the same arm in one trial as working memory error.

826 *Spontaneous alteration.* At P39, each mouse was positioned in the start arm of an  
827 elevated Y-maze. Visited arms during free exploration were monitored for 10 min.  
828 Percentage of alternations was calculated as (number of alternations / (entries - 2)). The  
829 test was used as habituation for delayed non-match-to-sample task.

830 *Delayed non-match-to-sample task.* At P39-40, mice were positioned in the start arm of  
831 an elevated Y-maze with access to the other arms containing a food pellet. After entering  
832 one arm, a central door was closed (sample choice). After the food pellet was consumed  
833 the mice were placed in the start arm for a second run (test choice) after a 30 s break.  
834 Each mouse performed 6 trials / day. Test choice was considered correct when visiting  
835 the arm not explored during sample phase.

### 836 ***Data analysis***

837 Data from in vivo and in vitro recordings were analyzed with custom-written algorithms in  
838 Matlab environment. In vivo data were band-pass filtered (500-9000 Hz for spike analysis  
839 or 1-100 Hz for LFP) using a third-order Butterworth filter forward and backward to  
840 preserve phase information before down-sampling to analyze LFP. For in vitro data, all  
841 potentials were corrected for liquid junction potentials (-10 mV). The resting membrane  
842 potential was measured immediately after obtaining the whole-cell configuration. To  
843 assess input resistance and membrane properties, 600 ms long hyperpolarizing current  
844 pulses were applied.

845 *Power spectral density.* For power spectral density analysis, 2 s-long windows of LFP  
846 signal were concatenated and the power was calculated using Welch's method with non-  
847 overlapping windows. Spectra were multiplied with squared frequency.

848 *Imaginary coherence.* The imaginary part of complex coherence, which is insensitive to  
849 volume conduction, was calculated by taking the absolute value of the imaginary  
850 component of the normalized cross-spectrum.

851 *Modulation index.* For optogenetic stimulations, modulation index was calculated as  
852 (value stimulation - value pre stimulation) / (value stimulation + value pre stimulation).

853 *Peak frequency and strength.* Peak frequency and peak strength were calculated for the  
854 most prominent peak in the spectrum defined by the product of peak amplitude, peak half  
855 width and peak prominence.

856 *Single unit analysis.* Single unit activity (SUA) was detected and clustered using klusta<sup>61</sup>  
857 and manually curated using phy (<https://github.com/cortex-lab/phy>). Modulation index of SUA  
858 firing rate was calculated on 3 s long windows pre- and during stimulation. Significance  
859 level was set at  $p < 0.01$  and calculated using Wilcoxon signed rank test for zero median  
860 for single stimulation trials. Single unit autocorrelation histogram was calculated using 0.5  
861 ms bins followed by frequency spectrum computation using discrete Fourier transform.  
862 Oscillation score was calculated by dividing peak magnitude of detected peak frequency  
863 by average spectrum magnitude for pre- and during stimulation periods. For pairwise  
864 neuronal correlation SUA spike trains were convolved using a gaussian window with a  
865 standard deviation of 20 ms. Correlation of convolved spike trains was computed using  
866 Spearman's rho. Cumulative distribution functions from before and during stimulations  
867 were compared using the two-sample Kolmogorov-Smirnov test. RS and FS units were  
868 distinguished by manually setting a threshold based on spike half width and trough-to-  
869 peak duration (FS, P11-12 halfwidth  $< 0.31$  ms, trough-to-peak  $< 1.28$  ms, P23-25 and P38-  
870 40 halfwidth  $< 0.31$  ms, trough-to-peak  $< 0.64$  ms).

871 *EPSCs and IPSCs extraction.* Voltage-clamp traces were demeaned and detrended with  
872 a median filter (mdefilt1). Traces were then deconvolved using a double exponential  
873 kernel using the OASIS toolbox ([https://github.com/zhoup/OASIS\\_matlab](https://github.com/zhoup/OASIS_matlab))<sup>62</sup>. After manual  
874 optimization of two separate kernels for EPSCs and IPSCs, the software was run with the  
875 “foopsi” model and a regularization parameter “lambda” set at the value of  $10^{-11}$ . The  
876 parameters “smin” and “b” were automatically optimized, separately for each trace. The

877 deconvolved traces were then used to compute the integral of EPSCs and IPSCs for  
878 baseline and stimulation periods.

879 *Statistics.* Statistical analyses were performed in the Matlab environment or in R  
880 Statistical Software (Foundation for Statistical Computing, Austria). Data are presented  
881 as median  $\pm$  median absolute deviation (MAD). Data were tested for significant  
882 differences (\* $P < 0.05$ , \*\* $P < 0.01$  and \*\*\* $P < 0.001$ ) using non-parametric Wilcoxon rank sum  
883 test for unpaired and Wilcoxon signed rank test for paired data or Kruskal-Wallis test with  
884 Bonferroni corrected post hoc analysis or Fisher's exact test for binary data analysis.  
885 Nested data were analyzed with linear mixed-effect models with animal as fixed effect  
886 and Turkey multi comparison correction for post hoc analysis. See Extended Data Tab. 1  
887 for detailed statistics.

888 **References**

- 889 1. Frith, C. & Dolan, R. The role of the prefrontal cortex in higher cognitive functions. *Brain Res. Cogn.*  
890 *Brain Res.* **5**, 175–181 (1996).
- 891 2. Miller, E. K. The prefrontal cortex and cognitive control. *Nat. Rev. Neurosci.* **1**, 59–65 (2000).
- 892 3. van Os, J. & Kapur, S. Schizophrenia. *The Lancet* **374**, 635–645 (2009).
- 893 4. Baron-Cohen, S. The cognitive neuroscience of autism. *J. Neurol. Neurosurg. Psychiatry* **75**, 945–948  
894 (2004).
- 895 5. Stuchlik, A. & Sumiyoshi, T. Cognitive Deficits in Schizophrenia and Other Neuropsychiatric Disorders:  
896 Convergence of Preclinical and Clinical Evidence. *Front. Behav. Neurosci.* **8**, (2014).
- 897 6. Clifton, N. E. *et al.* Dynamic expression of genes associated with schizophrenia and bipolar disorder  
898 across development. *Transl. Psychiatry* **9**, 1–9 (2019).
- 899 7. Sahin, M. & Sur, M. Genes, circuits, and precision therapies for autism and related neurodevelopmental  
900 disorders. *Science* **350**, (2015).
- 901 8. Marín, O. Developmental timing and critical windows for the treatment of psychiatric disorders. *Nat.*  
902 *Med.* **22**, 1229–1238 (2016).
- 903 9. Hall, J., Trent, S., Thomas, K. L., O'Donovan, M. C. & Owen, M. J. Genetic risk for schizophrenia:  
904 convergence on synaptic pathways involved in plasticity. *Biol. Psychiatry* **77**, 52–58 (2015).
- 905 10. Schmitt, A., Malchow, B., Hasan, A. & Falkai, P. The impact of environmental factors in severe  
906 psychiatric disorders. *Front. Neurosci.* **8**, (2014).
- 907 11. Geschwind, D. H. Genetics of autism spectrum disorders. *Trends Cogn. Sci.* **15**, 409–416 (2011).
- 908 12. Leicht, G. *et al.* EEG-Informed fMRI Reveals a Disturbed Gamma-Band-Specific Network in Subjects  
909 at High Risk for Psychosis. *Schizophr. Bull.* **42**, 239–249 (2016).
- 910 13. Mikanmaa, E. *et al.* Towards a neurodynamical understanding of the prodrome in schizophrenia.  
911 *NeuroImage* **190**, 144–153 (2019).
- 912 14. Chini, M. *et al.* Resolving and Rescuing Developmental Miswiring in a Mouse Model of Cognitive  
913 Impairment. *Neuron* **105**, 60-74.e7 (2020).
- 914 15. Hartung, H. *et al.* From Shortage to Surge: A Developmental Switch in Hippocampal-Prefrontal  
915 Coupling in a Gene-Environment Model of Neuropsychiatric Disorders. *Cereb. Cortex N. Y. N 1991* **26**,  
916 4265–4281 (2016).
- 917 16. Peixoto, R. T., Wang, W., Croney, D. M., Kozorovitskiy, Y. & Sabatini, B. L. Early hyperactivity and  
918 precocious maturation of corticostriatal circuits in Shank3B<sup>-/-</sup> mice. *Nat. Neurosci.* **19**, 716–724  
919 (2016).
- 920 17. Richter, M. *et al.* Altered TAOK2 activity causes autism-related neurodevelopmental and cognitive  
921 abnormalities through RhoA signaling. *Mol. Psychiatry* **24**, 1329–1350 (2019).
- 922 18. Kirischuk, S. *et al.* Modulation of Neocortical Development by Early Neuronal Activity: Physiology and  
923 Pathophysiology. *Front. Cell. Neurosci.* **11**, (2017).

- 924 19. Kirkby, L. A., Sack, G. S., Firl, A. & Feller, M. B. A Role for Correlated Spontaneous Activity in the  
925 Assembly of Neural Circuits. *Neuron* **80**, 1129–1144 (2013).
- 926 20. Katz, L. C. & Shatz, C. J. Synaptic Activity and the Construction of Cortical Circuits. *Science* **274**, 1133–  
927 1138 (1996).
- 928 21. Blanquie, O. *et al.* Electrical activity controls area-specific expression of neuronal apoptosis in the  
929 mouse developing cerebral cortex. *eLife* **6**, e27696 (2017).
- 930 22. Brockmann, M. D., Pöschel, B., Cichon, N. & Hanganu-Opatz, I. L. Coupled Oscillations Mediate  
931 Directed Interactions between Prefrontal Cortex and Hippocampus of the Neonatal Rat. *Neuron* **71**,  
932 332–347 (2011).
- 933 23. Ahlbeck, J., Song, L., Chini, M., Bitzenhofer, S. H. & Hanganu-Opatz, I. L. Glutamatergic drive along  
934 the septo-temporal axis of hippocampus boosts prelimbic oscillations in the neonatal mouse. *eLife* **7**,  
935 (2018).
- 936 24. Janiesch, P. C., Krüger, H.-S., Pöschel, B. & Hanganu-Opatz, I. L. Cholinergic control in developing  
937 prefrontal-hippocampal networks. *J. Neurosci. Off. J. Soc. Neurosci.* **31**, 17955–17970 (2011).
- 938 25. Hartung, H., Brockmann, M. D., Pöschel, B., De Feo, V. & Hanganu-Opatz, I. L. Thalamic and  
939 Entorhinal Network Activity Differently Modulates the Functional Development of Prefrontal-  
940 Hippocampal Interactions. *J. Neurosci. Off. J. Soc. Neurosci.* **36**, 3676–3690 (2016).
- 941 26. Bitzenhofer, S. H. *et al.* Layer-specific optogenetic activation of pyramidal neurons causes beta-gamma  
942 entrainment of neonatal networks. *Nat. Commun.* **8**, 14563 (2017).
- 943 27. Bitzenhofer, S. H., Sieben, K., Siebert, K. D., Spehr, M. & Hanganu-Opatz, I. L. Oscillatory activity in  
944 developing prefrontal networks results from theta-gamma-modulated synaptic inputs. *Cell Rep.* **11**,  
945 486–497 (2015).
- 946 28. Workman, A. D., Charvet, C. J., Clancy, B., Darlington, R. B. & Finlay, B. L. Modeling transformations  
947 of neurodevelopmental sequences across mammalian species. *J. Neurosci. Off. J. Soc. Neurosci.* **33**,  
948 7368–7383 (2013).
- 949 29. Lim, L., Mi, D., Llorca, A. & Marín, O. Development and functional diversification of cortical  
950 interneurons. *Neuron* **100**, 294–313 (2018).
- 951 30. Anastasiades, P. G. & Butt, S. J. B. A Role for Silent Synapses in the Development of the Pathway  
952 from Layer 2/3 to 5 Pyramidal Cells in the Neocortex. *J. Neurosci.* **32**, 13085–13099 (2012).
- 953 31. Bitzenhofer, S. H., Ahlbeck, J. & Hanganu-Opatz, I. L. Methodological Approach for Optogenetic  
954 Manipulation of Neonatal Neuronal Networks. *Front. Cell. Neurosci.* **11**, 239 (2017).
- 955 32. Lindemann, C., Ahlbeck, J., Bitzenhofer, S. H. & Hanganu-Opatz, I. L. Spindle Activity Orchestrates  
956 Plasticity during Development and Sleep. *Neural Plast.* **2016**, 5787423 (2016).
- 957 33. Le Roy, I., Carlier, M. & Roubertoux, P. L. Sensory and motor development in mice: genes, environment  
958 and their interactions. *Behav. Brain Res.* **125**, 57–64 (2001).
- 959 34. Barker, G. R. I. & Warburton, E. C. When Is the Hippocampus Involved in Recognition Memory? *J.*  
960 *Neurosci.* **31**, 10721–10731 (2011).



- 961 35. Bitzenhofer, S. H., Poeppelau, J. A. & Hanganu-Opatz, I. L. Gamma activity accelerates during prefrontal  
962 development. *bioRxiv* 2020.03.10.986281 (2020) doi:10.1101/2020.03.10.986281.
- 963 36. Chen, G. *et al.* Distinct Inhibitory Circuits Orchestrate Cortical beta and gamma Band Oscillations.  
964 *Neuron* **96**, 1403-1418.e6 (2017).
- 965 37. Atallah, B. V. & Scanziani, M. Instantaneous modulation of gamma oscillation frequency by balancing  
966 excitation with inhibition. *Neuron* **62**, 566–577 (2009).
- 967 38. Wong, F. K. *et al.* Pyramidal cell regulation of interneuron survival sculpts cortical networks. *Nature*  
968 **557**, 668–673 (2018).
- 969 39. Cardin, J. A. *et al.* Driving fast-spiking cells induces gamma rhythm and controls sensory responses.  
970 *Nature* **459**, 663–667 (2009).
- 971 40. Pfeffer, C. K., Xue, M., He, M., Huang, Z. J. & Scanziani, M. Inhibition of Inhibition in Visual Cortex:  
972 The Logic of Connections Between Molecularly Distinct Interneurons. *Nat. Neurosci.* **16**, 1068–1076  
973 (2013).
- 974 41. Clause, A. *et al.* The precise temporal pattern of prehearing spontaneous activity is necessary for  
975 tonotopic map refinement. *Neuron* **82**, 822–835 (2014).
- 976 42. Huberman, A. D., Speer, C. M. & Chapman, B. Spontaneous retinal activity mediates development of  
977 ocular dominance columns and binocular receptive fields in v1. *Neuron* **52**, 247–254 (2006).
- 978 43. Iyer, K. K. *et al.* Cortical burst dynamics predict clinical outcome early in extremely preterm infants.  
979 *Brain J. Neurol.* **138**, 2206–2218 (2015).
- 980 44. Robertson, C. E. & Baron-Cohen, S. Sensory perception in autism. *Nat. Rev. Neurosci.* **18**, 671–684  
981 (2017).
- 982 45. Khazipov, R. *et al.* Early motor activity drives spindle bursts in the developing somatosensory cortex.  
983 *Nature* **432**, 758–761 (2004).
- 984 46. Hanganu, I. L., Ben-Ari, Y. & Khazipov, R. Retinal Waves Trigger Spindle Bursts in the Neonatal Rat  
985 Visual Cortex. *J. Neurosci.* **26**, 6728–6736 (2006).
- 986 47. Hoerder-Suabedissen, A. & Molnár, Z. Development, evolution and pathology of neocortical subplate  
987 neurons. *Nat. Rev. Neurosci.* **16**, 133–146 (2015).
- 988 48. Wayman, G. A. *et al.* Activity-Dependent Dendritic Arborization Mediated by CaM-Kinase I Activation  
989 and Enhanced CREB-Dependent Transcription of Wnt-2. *Neuron* **50**, 897–909 (2006).
- 990 49. Courchesne, E. Brain development in autism: early overgrowth followed by premature arrest of growth.  
991 *Ment. Retard. Dev. Disabil. Res. Rev.* **10**, 106–111 (2004).
- 992 50. Denaxa, M. *et al.* Modulation of Apoptosis Controls Inhibitory Interneuron Number in the Cortex. *Cell*  
993 *Rep.* **22**, 1710–1721 (2018).
- 994 51. Cho, K. K. A. *et al.* Gamma Rhythms Link Prefrontal Interneuron Dysfunction with Cognitive Inflexibility  
995 in Dlx5/6+/- Mice. *Neuron* **85**, 1332–1343 (2015).

- 996 52. Bastos, A. M., Loonis, R., Kornblith, S., Lundqvist, M. & Miller, E. K. Laminar recordings in frontal cortex  
997 suggest distinct layers for maintenance and control of working memory. *Proc. Natl. Acad. Sci.* **115**,  
998 1117–1122 (2018).
- 999 53. Sohal, V. S. & Rubenstein, J. L. R. Excitation-inhibition balance as a framework for investigating  
1000 mechanisms in neuropsychiatric disorders. *Mol. Psychiatry* **24**, 1248–1257 (2019).
- 1001 54. Uhlhaas, P. J. & Singer, W. Abnormal neural oscillations and synchrony in schizophrenia. *Nat. Rev.*  
1002 *Neurosci.* **11**, 100–113 (2010).
- 1003 55. Gallinat, J., Winterer, G., Herrmann, C. S. & Senkowski, D. Reduced oscillatory gamma-band  
1004 responses in unmedicated schizophrenic patients indicate impaired frontal network processing. *Clin.*  
1005 *Neurophysiol. Off. J. Int. Fed. Clin. Neurophysiol.* **115**, 1863–1874 (2004).
- 1006 56. Altimier, L. & Phillips, R. The Neonatal Integrative Developmental Care Model: Advanced Clinical  
1007 Applications of the Seven Core Measures for Neuroprotective Family-centered Developmental Care.  
1008 *Newborn Infant Nurs. Rev.* **16**, 230–244 (2016).
- 1009 57. Moiseev, A., Doesburg, S. M., Herdman, A. T., Ribary, U. & Grunau, R. E. Altered Network Oscillations  
1010 and Functional Connectivity Dynamics in Children Born Very Preterm. *Brain Topogr.* **28**, 726–745  
1011 (2015).
- 1012 58. Als, H. *et al.* Early experience alters brain function and structure. *Pediatrics* **113**, 846–857 (2004).
- 1013 59. Taylor, H. G. & Clark, C. A. C. Executive function in children born preterm: Risk factors and implications  
1014 for outcome. *Semin. Perinatol.* **40**, 520–529 (2016).
- 1015 60. Pennington, Z. T. *et al.* ezTrack: An open-source video analysis pipeline for the investigation of animal  
1016 behavior. *Sci. Rep.* **9**, 1–11 (2019).
- 1017 61. Rossant, C. *et al.* Spike sorting for large, dense electrode arrays. *Nat. Neurosci.* **19**, 634–641 (2016).
- 1018 62. Friedrich, J., Zhou, P. & Paninski, L. Fast online deconvolution of calcium imaging data. *PLoS Comput.*  
1019 *Biol.* **13**, e1005423 (2017).
- 1020
